# Supplementary material for: Bifunctional primary amine-thiourea–TfOH (BPAT·TfOH) as a chiral phase-transfer catalyst: the asymmetric synthesis of dihydropyrimidines
Source: Royal Society of Chemistry journal article supplement (doi:10.1039/c0ob01268h), 2011-01-01
Supplement: c0ob01268h.pdf [file c0ob01268h.pdf]

Supplementary Material (ESI) for Organic & Biomolecular Chemistry  
This journal is (c) The Royal Society of Chemistry 2011

**Bifunctional Primary Amine-Thiourea-TfOH (BPAT·TfOH) as Chiral Phase-Transfer Catalysts:**

**Asymmetric Synthesis of Dihydropyrimidines**

Yangyun Wang, Jipan Yu, Zhiwei Miao,\* and Ruyun Chen\*

*State Key Laboratory and Institute of Elemento-Organic Chemistry, Nankai University, Tianjin 300071, China Fax:*

*(+86)-22-2350-2351; e-mail: miaoziwei@nankai.edu.cn*

## Supporting Information

### List of contents (pages)

|                                                      |    |
|------------------------------------------------------|----|
| 1. General comments.....                             | S1 |
| 2. General Procedure for the Biginelli reaction..... | S1 |

#### General Comments.

All reactions were performed under air atmosphere. Unless otherwise indicated, all materials were obtained from commercial sources, and used as purchased without dehydration. Element analyses were carried out on a Yanaco CHN Corder MT-3 automatic analyzer in the Analysis Center of Nankai University.  $^1\text{H}$  NMR and  $^{13}\text{C}$  NMR spectra were recorded in  $\text{CDCl}_3$  or  $[\text{D}_6]$ -DMSO at Bruker 400 MHz spectrometers. TMS served as internal standard ( $\delta = 0$  ppm) for  $^1\text{H}$  MNR and DMSO were used as internal standard ( $\delta = 42.4$  ppm) for  $^{13}\text{C}$  NMR; the coupling constants  $J$  are given in Hz. HPLC analyses were recorded on a chiral column (Daicel Chiralcel OD-H column, at 254 nm). Melting points were determined on a T-4 melting point apparatus. Optical rotations were recorded on a Perkin Elemer 241 Polarimeter.

#### General Procedure for the Biginelli reaction:

To a suspension of the catalyst BPAT (I) (0.039 g, 0.075 mmol) in saturated brine (2 mL) was added trifluoromethane sulfonic acid (0.011 g, 0.075 mmol). After stirring for 30 minutes, aldehyde **6** (0.75 mmol), urea **5** (0.030 g, 0.5 mmol), ethyl acetoacetate **7** (0.195 g, 1.5 mmol) and  $t\text{-BuNH}_2\cdot\text{TFA}$  (0.009 g, 0.05 mmol) were added sequentially. The reaction mixture was stirred at room temperature for 36 hours. After completion of the reaction, the result mixture was then extracted by AcOEt and dried with anhydrous sodium sulfate. After concentrated the residue was purified by CC (silica gel, AcOEt/petroleum ether (b.p. 60-90°C) 3:2) to afford DHPMs as a white solid.

**(S)-(+)-5-Ethoxycarbonyl-6-methyl-4-phenyl-3,4-dihydropyrimidin-2(1H)-one (8a):**

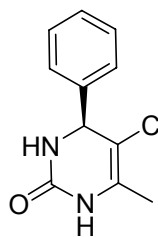

White solid; mp 206-207 °C;  $[\alpha]_D^{20} = 65^\circ$  (c = 0.5, MeOH);  $^1\text{H-NMR}$  (400 MHz,

$\text{CDCl}_3$ ):  $\delta$  1.16 (t,  $^3J_{\text{H,H}} = 6.8$  Hz, 3H,  $\text{OCH}_2\text{CH}_3$ ), 2.34 (s, 3H,  $\text{CH}_3$ ), 4.08 (q,  $^3J_{\text{H,H}} =$

6.8 Hz, 2H,  $\text{OCH}_2\text{CH}_3$ ), 5.40 (d,  $^3J_{\text{H,H}} = 2.4$  Hz, 1H, CH), 5.79 (s, 1H, NH),

7.27-7.32 (m, 5H, Ph), 8.25 (s, 1H, NH);  $^{13}\text{C-NMR}$  (75 MHz,  $\text{CDCl}_3$ ):  $\delta$  14.14, 18.67, 55.72, 60.03,

101.32, 126.60, 127.99, 128.71, 143.09, 146.33, 153.35, 165.63; ESI-MS: 259.07 ( $[\text{M-H}]^-$ ); The

enantiomeric excess was determined to be >99% by HPLC with Chiralcel OD-H column (25 cm) at

254 nm; eluent: hexane:  $^i\text{PrOH}$  (85:15), flow rate = 1.0 mL/min,  $t_r = 9.567$  min (major).

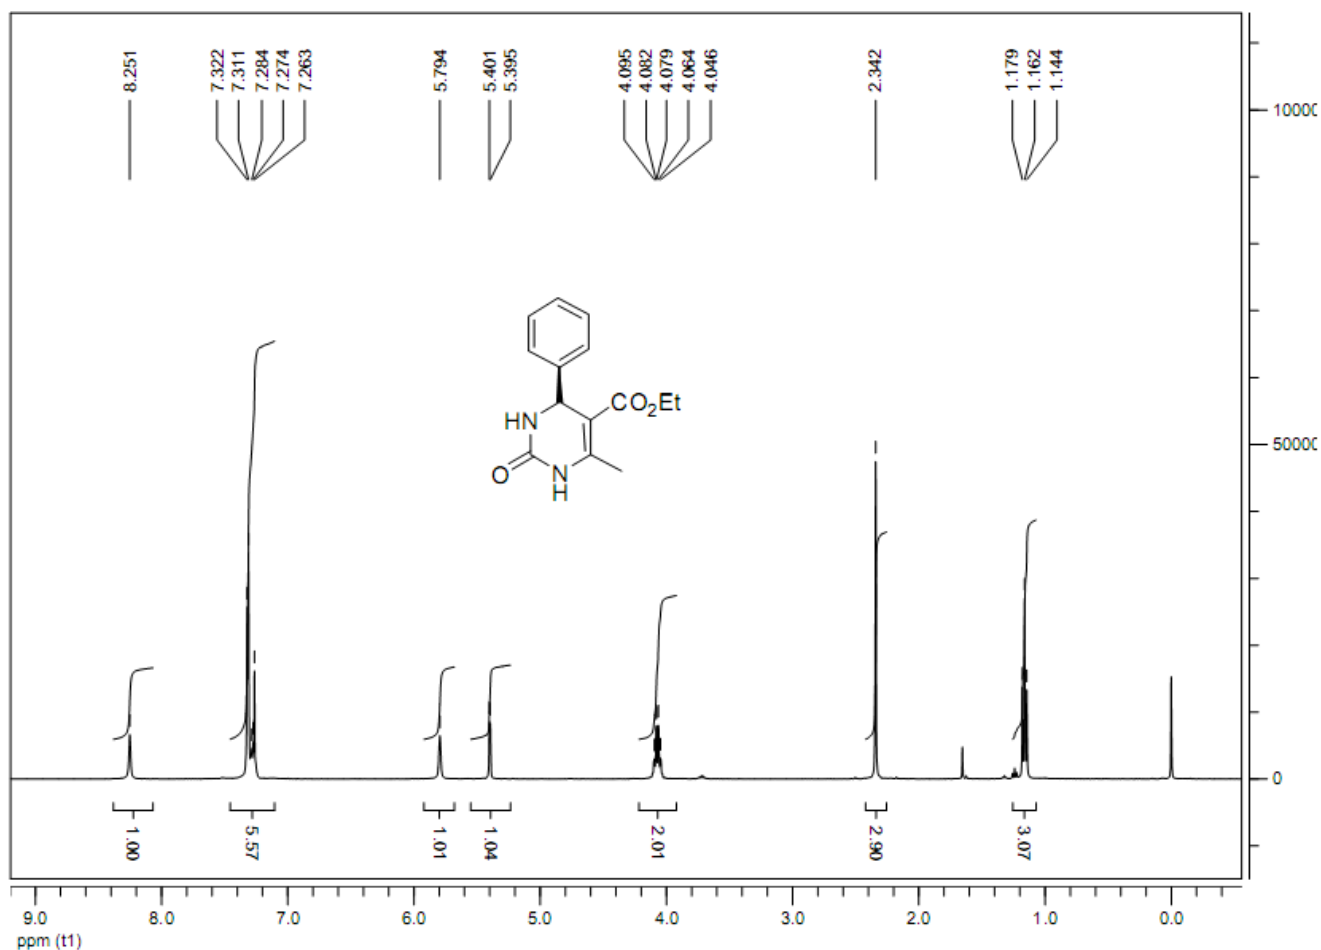

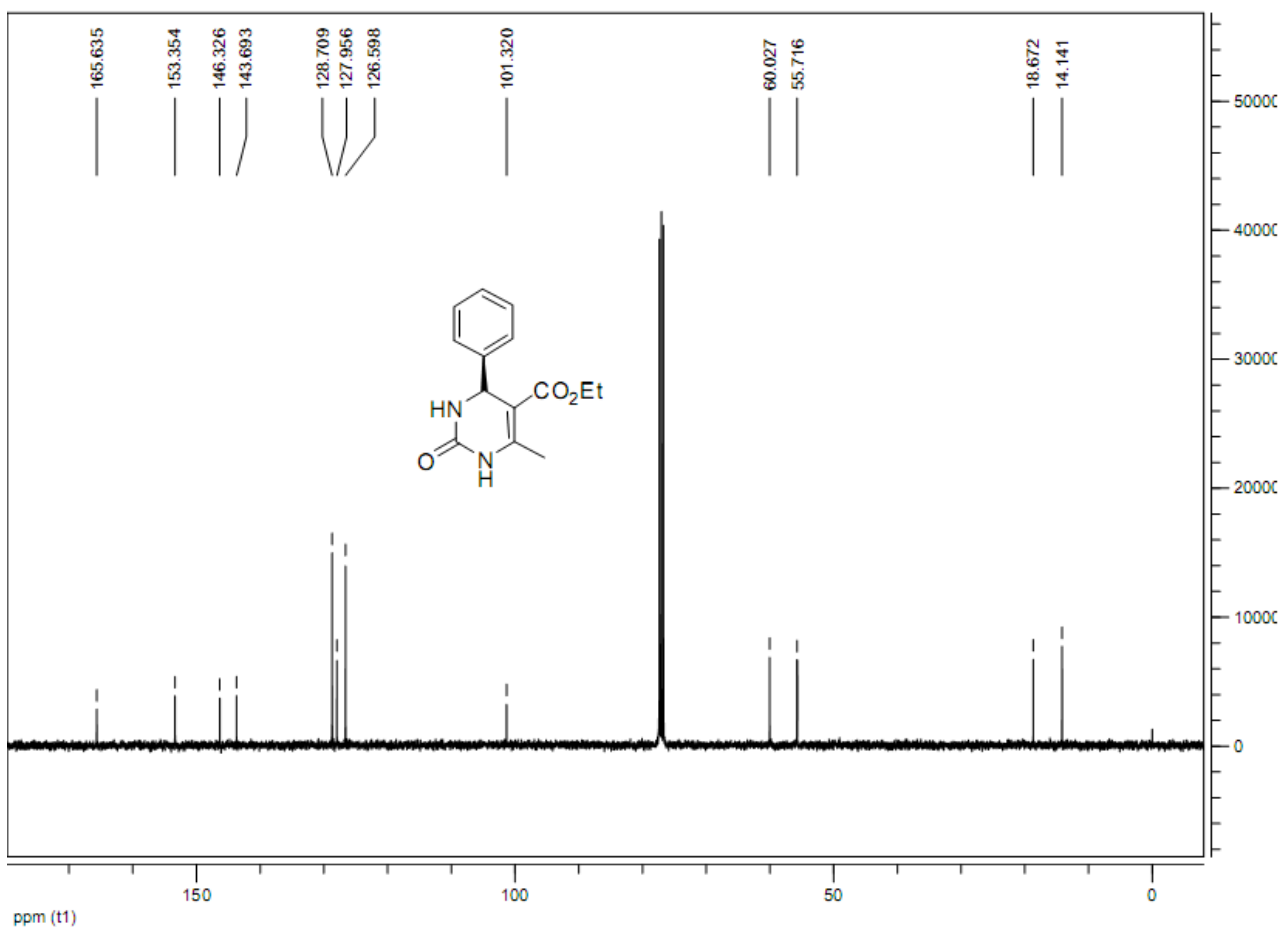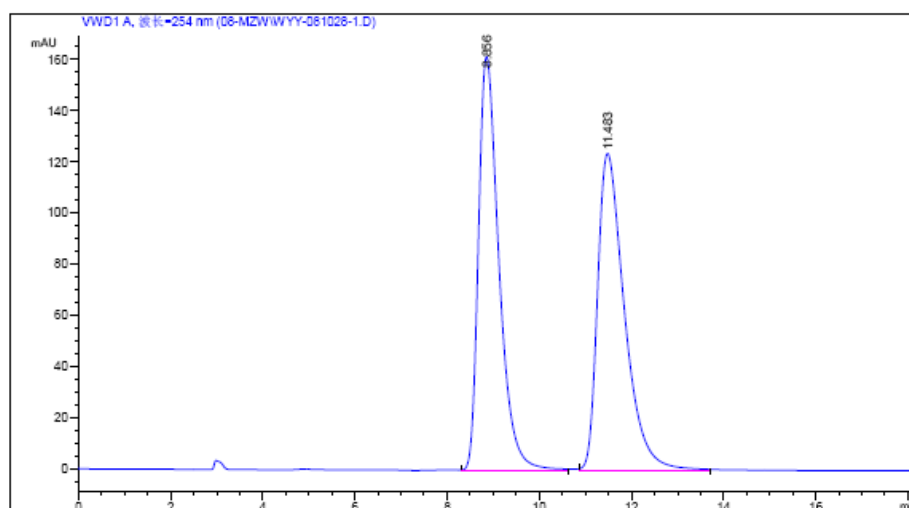

信号 1: VWD1 A, 波长=254 nm

| 峰 # | 保留时间 [min] | 类型 | 峰宽 [min] | 峰面积 mAU * s | 峰高 [mAU]  | 峰面积 %   |
|-----|------------|----|----------|-------------|-----------|---------|
| 1   | 8.856      | BB | 0.4766   | 4976.65479  | 161.21957 | 49.8219 |
| 2   | 11.483     | BB | 0.6124   | 5012.23193  | 123.73526 | 50.1781 |

总量 : 9988.88672 284.95483

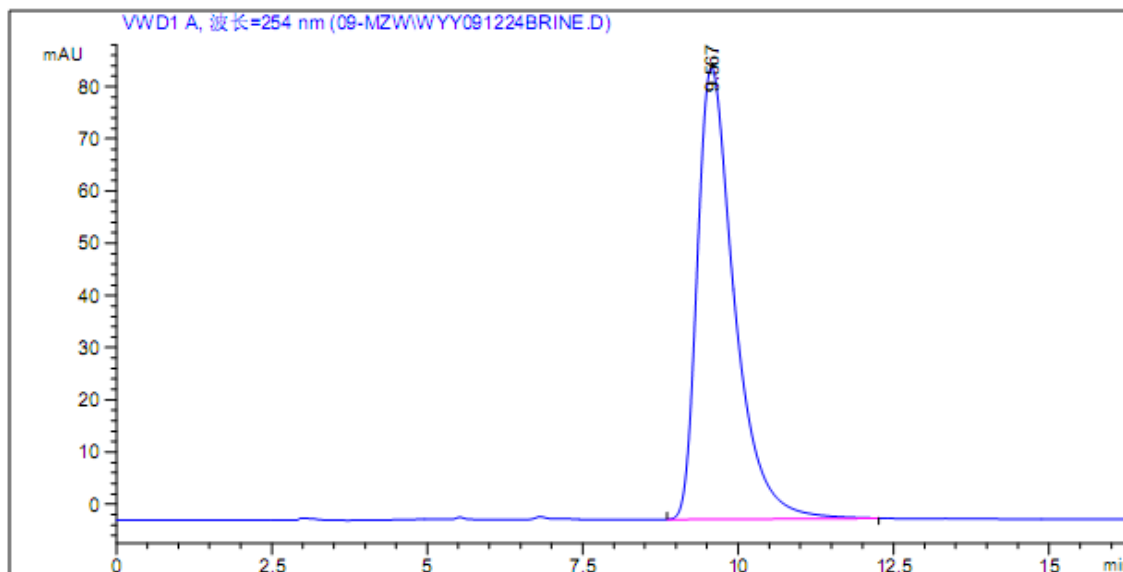

信号 1: VWD1 A, 波长=254 nm

| 峰 #  | 保留时间 [min] | 类型 | 峰宽 [min] | 峰面积 mAU * s | 峰高 [mAU] | 峰面积 %    |
|------|------------|----|----------|-------------|----------|----------|
| 1    | 9.567      | BB | 0.6234   | 3590.40283  | 86.60828 | 100.0000 |
| 总量 : |            |    |          | 3590.40283  | 86.60828 |          |

**(S)-(+)-5-Ethoxycarbonyl-6-methyl-4-(4-fluorophenyl)-3,4-dihydropyrimidin-2(1H)-one (8b):**

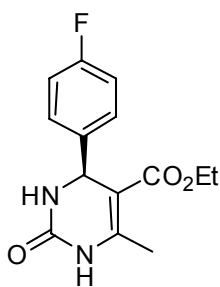

White solid; mp 191-192 °C;  $[\alpha]_D^{20} = 65^\circ$  (c = 0.5, MeOH);  $^1\text{H-NMR}$  (400 MHz,  $\text{CDCl}_3$ ):  $\delta$  1.16 (t,  $^3J_{\text{H,H}} = 6.8$  Hz, 3H,  $\text{OCH}_2\text{CH}_3$ ), 2.32 (s, 3H,  $\text{CH}_3$ ), 4.07 (q,  $^3J_{\text{H,H}} = 6.8$  Hz, 2H,  $\text{OCH}_2\text{CH}_3$ ), 5.39 (d,  $^3J_{\text{H,H}} = 2.4$  Hz, 1H, CH), 6.29 (s, 1H, NH), 6.99-7.29 (m, 4H, Ph), 8.69 (s, 1H, NH);  $^{13}\text{C-NMR}$  (75 MHz,  $\text{CDCl}_3$ ):  $\delta$  14.16,

18.57, 54.92, 60.11, 101.22, 115.52, 128.30, 139.65, 146.44, 153.74, 161.07, 163.52, 165.55; ESI-MS: 277.07 ( $[\text{M-H}]^-$ ); The enantiomeric excess was determined to be 88% by HPLC with Chiralcel OD-H column (25 cm) at 254 nm; eluent: hexane:  $i\text{PrOH}$  (85:15), flow rate = 1.0 mL/min,  $t_r = 8.284$  min (major),  $t_r = 12.923$  min (minor).

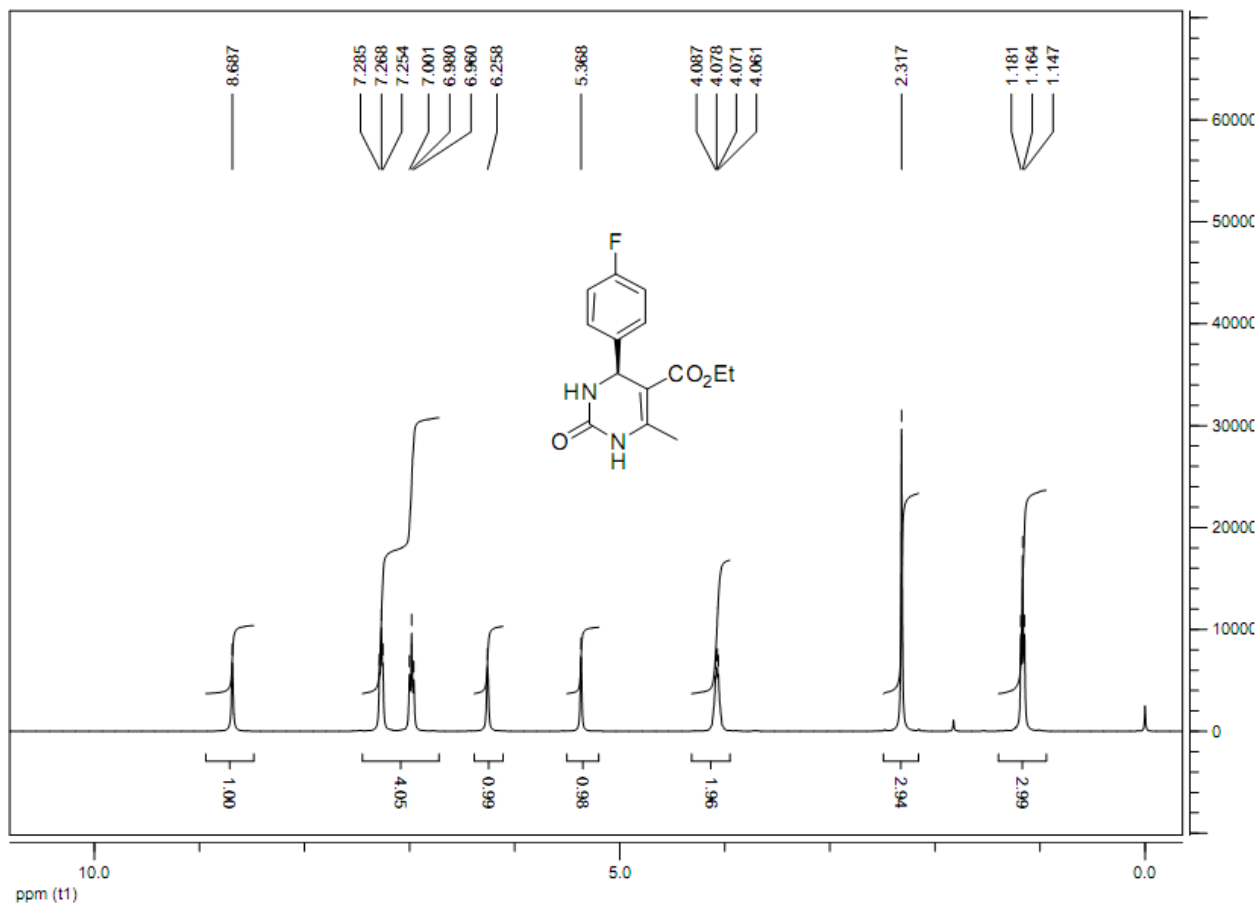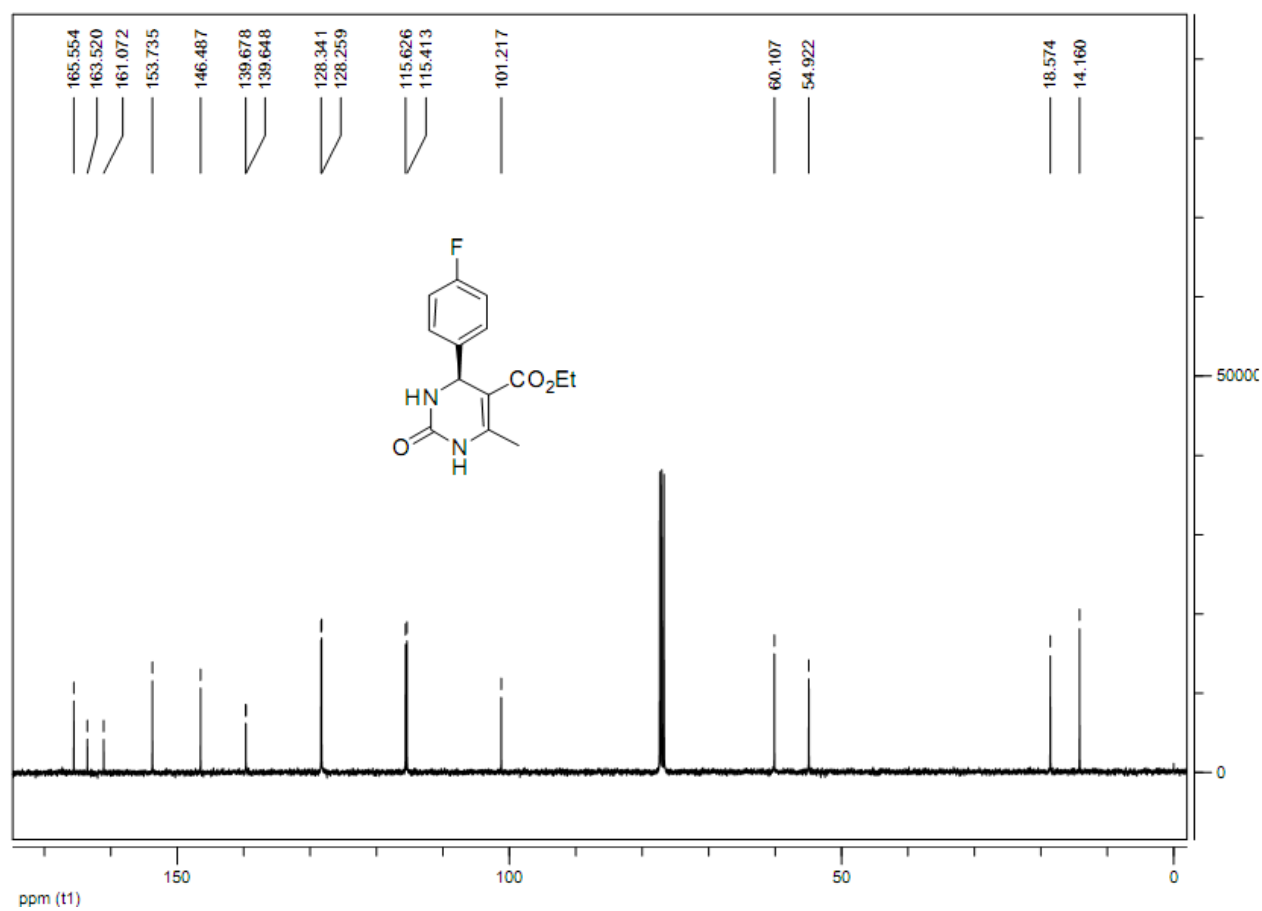

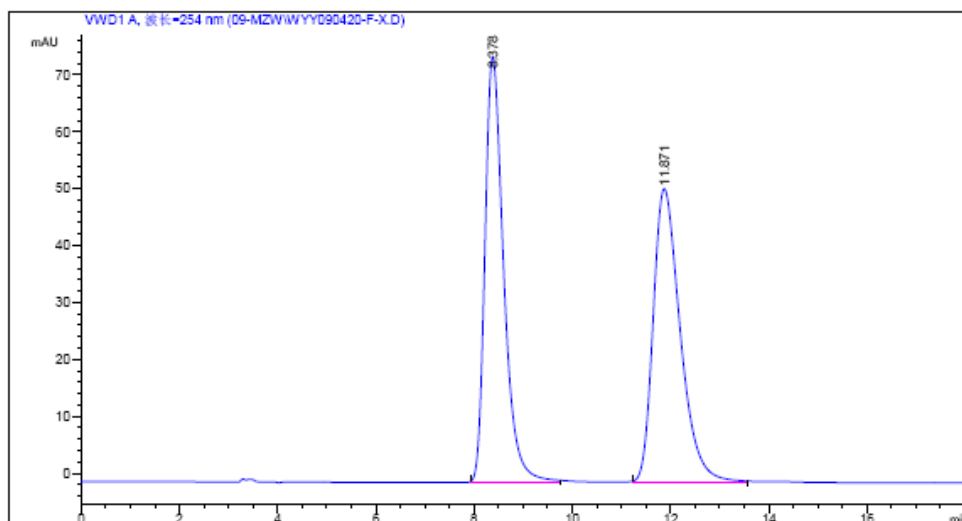

信号 1: VWD1 A, 波长=254 nm

| 峰 #  | 保留时间 [min] | 类型 | 峰宽 [min] | 峰面积 mAU    | 峰高 [mAU]  | 峰面积 %   |
|------|------------|----|----------|------------|-----------|---------|
| 1    | 8.378      | BB | 0.4019   | 1976.35620 | 74.67902  | 50.0409 |
| 2    | 11.871     | BB | 0.5864   | 1973.12341 | 51.54118  | 49.9591 |
| 总量 : |            |    |          | 3949.47961 | 126.22020 |         |

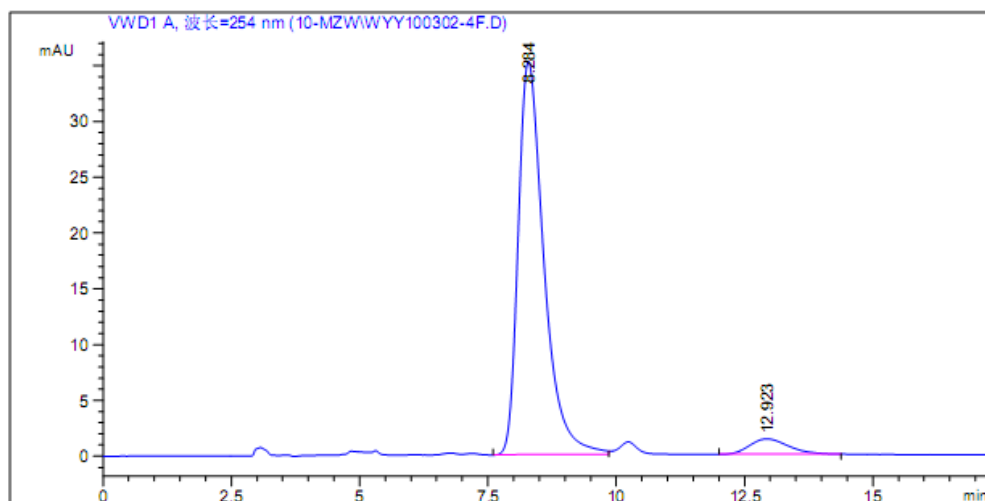

信号 1: VWD1 A, 波长=254 nm

| 峰 #  | 保留时间 [min] | 类型 | 峰宽 [min] | 峰面积 mAU *s | 峰高 [mAU] | 峰面积 %   |
|------|------------|----|----------|------------|----------|---------|
| 1    | 8.284      | VV | 0.5293   | 1229.63232 | 35.24976 | 94.2333 |
| 2    | 12.923     | BB | 0.6611   | 75.24824   | 1.38917  | 5.7667  |
| 总量 : |            |    |          | 1304.88056 | 36.63893 |         |

**(S)-(+)-5-Ethoxycarbonyl-6-methyl-4-(4-chlorophenyl)-3,4-dihydropyrimidin-2(1H)-one (8c):**

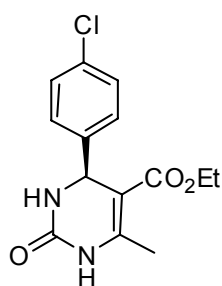

White solid; mp 210-212 °C;  $[\alpha]_D^{20} = 37^\circ$  (c = 0.5, MeOH);  $^1\text{H-NMR}$  (400 MHz,  $\text{CDCl}_3$ ):  $\delta$  1.17 (t,  $^3J_{\text{H,H}} = 6.8$  Hz, 3H,  $\text{OCH}_2\text{CH}_3$ ), 2.31 (s, 3H,  $\text{CH}_3$ ), 4.09 (q,  $^3J_{\text{H,H}} = 6.8$  Hz, 2H,  $\text{OCH}_2\text{CH}_3$ ), 5.36 (s, 1H, CH), 6.32 (s, 1H, NH), 7.22-7.30 (m, 4H, Ph), 8.64 (s, 1H, NH);  $^{13}\text{C-NMR}$  (75 MHz,  $\text{CDCl}_3$ ):  $\delta$  14.19, 18.62, 54.98, 60.19, 101.10,

128.01, 128.87, 133.70, 142.24, 146.65, 153.72, 165.51; ESI-MS: 293.00 ( $[\text{M-H}]^-$ ); The enantiomeric excess was determined to be 55% by HPLC with Chiralcel OD-H column (25 cm) at 254 nm; eluent: hexane:  $i$ -PrOH (85:15), flow rate = 1.0 mL/min,  $t_r = 8.405$  min (major),  $t_r = 13.303$  min (minor).



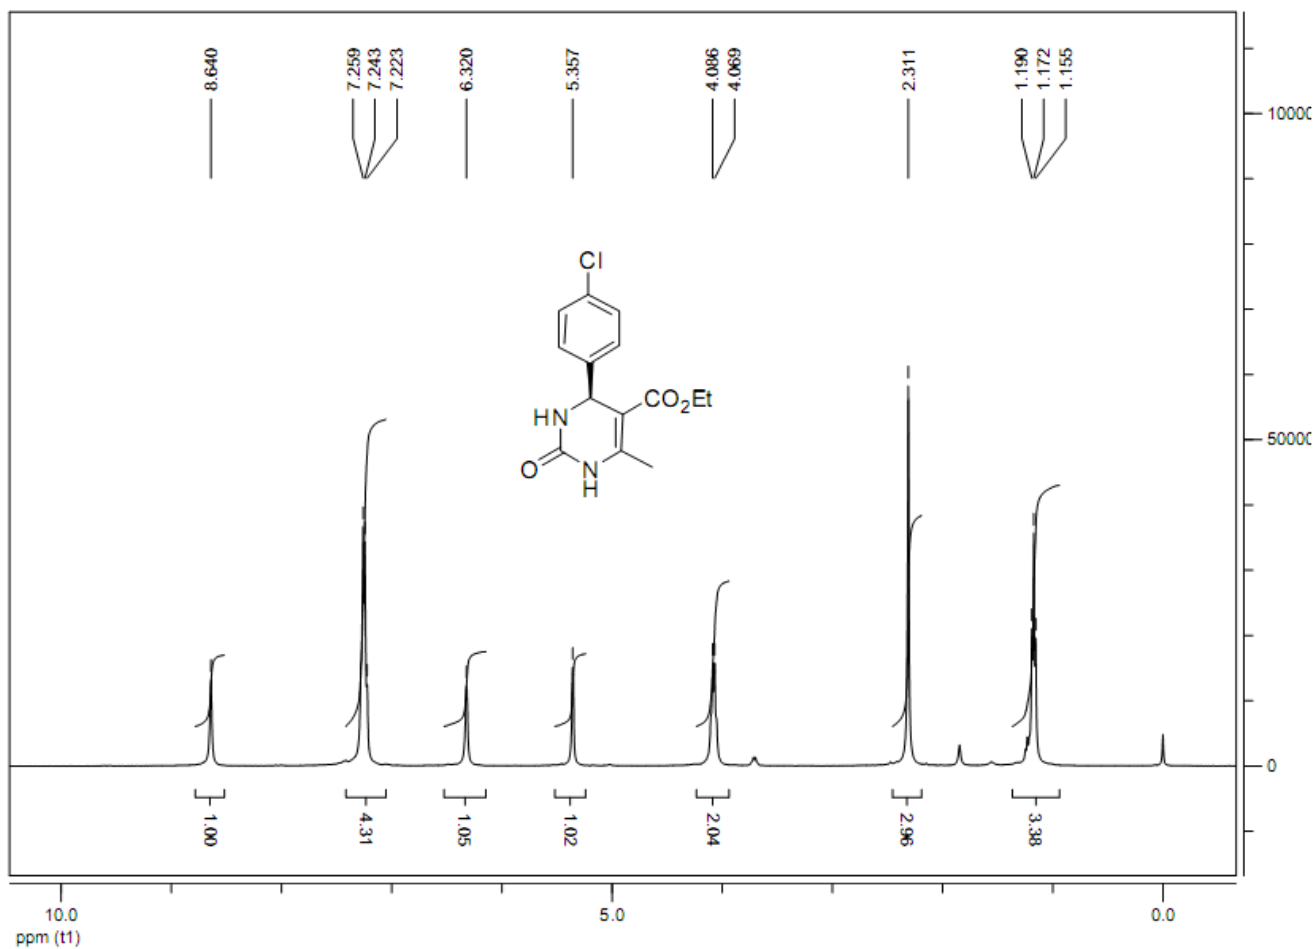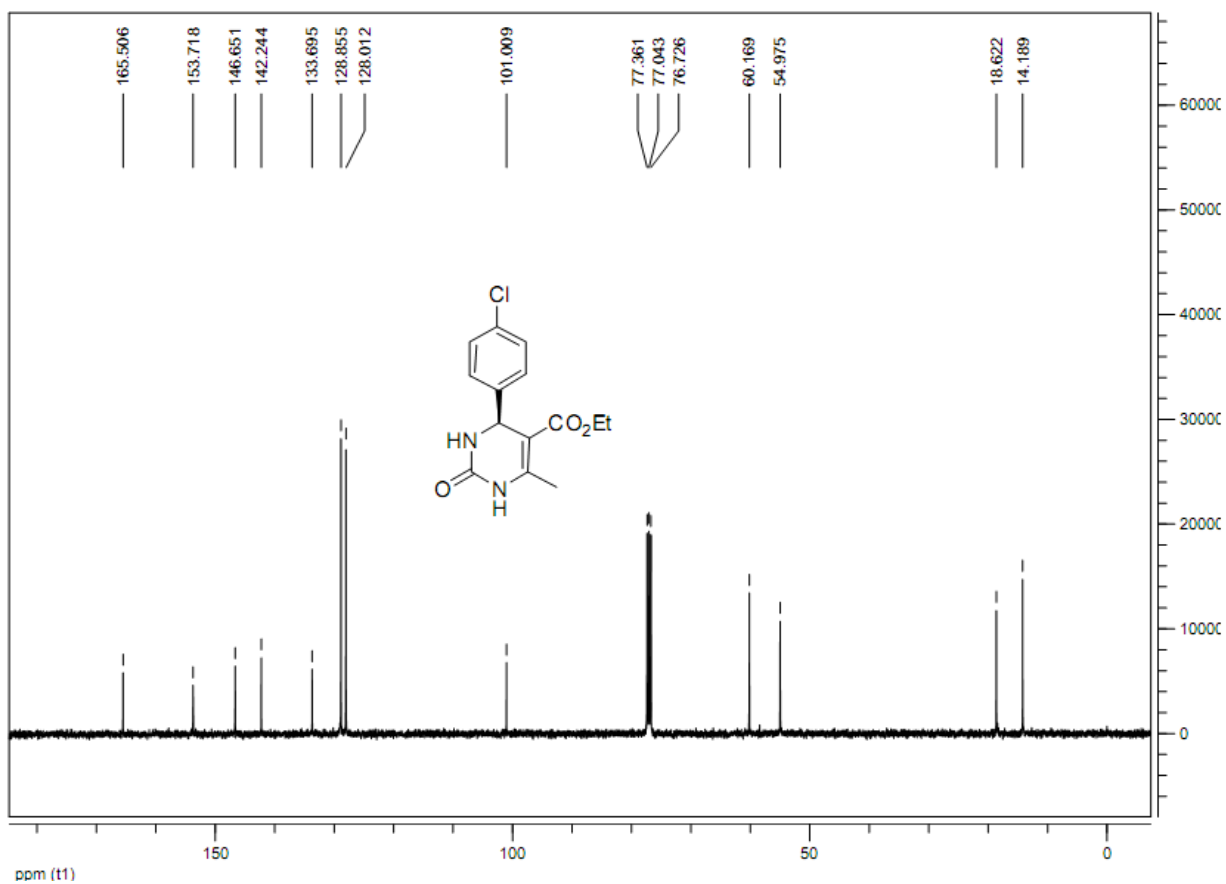

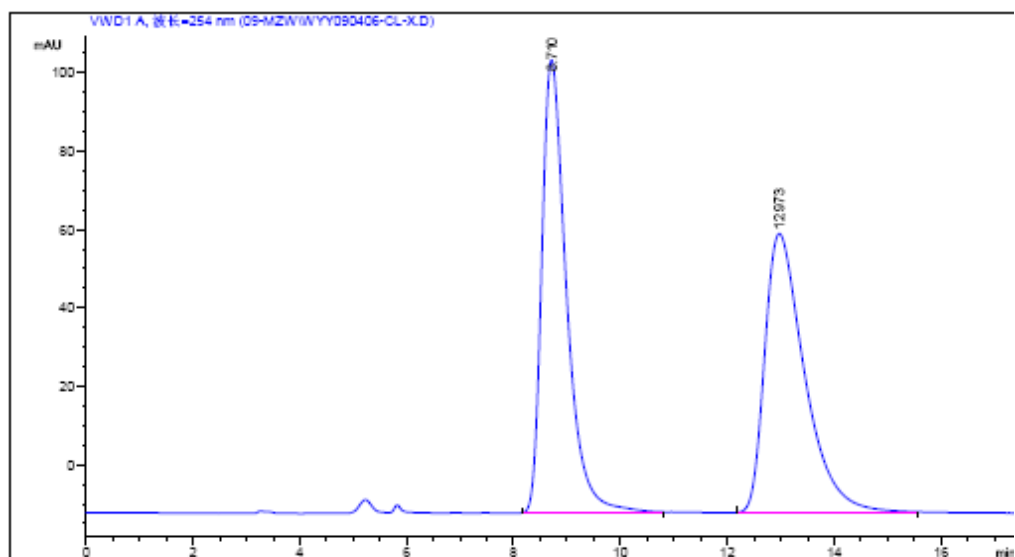

信号 1: VWD1 A, 波长=254 nm

| 峰 #  | 保留时间 [min] | 类型 | 峰宽 [min] | 峰面积 mAU * s | 峰高 [mAU]  | 峰面积 %   |
|------|------------|----|----------|-------------|-----------|---------|
| 1    | 8.710      | BB | 0.4806   | 3712.99561  | 115.27662 | 50.1381 |
| 2    | 12.973     | BB | 0.7805   | 3692.52442  | 71.11437  | 49.8619 |
| 总量 : |            |    |          | 7405.52003  | 186.39099 |         |

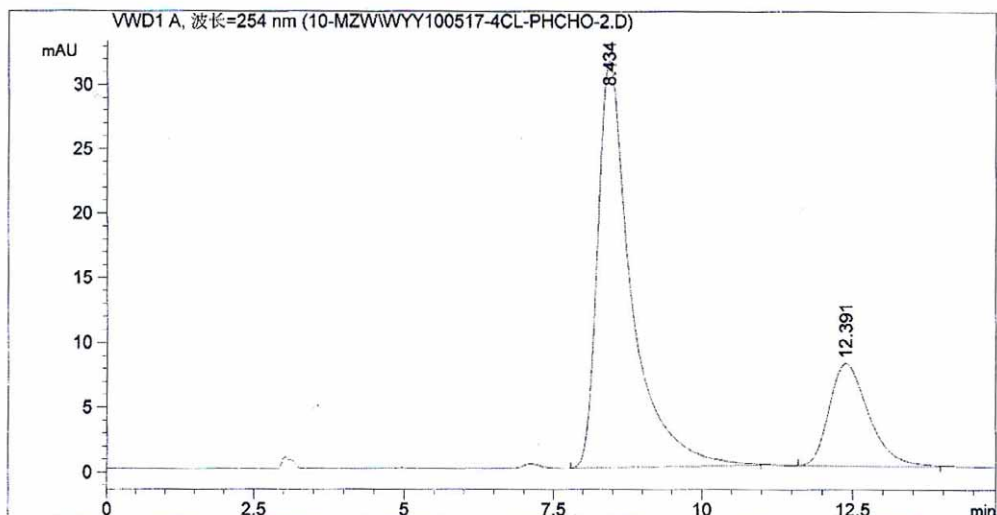

面积百分比报告

排序 : 信号  
 乘积因子 : 1.0000  
 稀释因子 : 1.0000  
 内标使用乘积因子和稀释因子

信号 1: VWD1 A, 波长=254 nm

| 峰 # | 保留时间 [min] | 类型 | 峰宽 [min] | 峰面积 mAU *s | 峰高 [mAU] | 峰面积 %   |
|-----|------------|----|----------|------------|----------|---------|
| 1   | 8.434      | BB | 0.5761   | 1248.09851 | 31.48043 | 77.7798 |
| 2   | 12.391     | BB | 0.6888   | 356.55841  | 7.91247  | 22.2202 |

总量 : 1604.65692 39.39290

**(S)-(+)-5-Ethoxycarbonyl-6-methyl-4-(4-bromophenyl)-3,4-dihydropyrimidin-2(1H)-one (8d):**

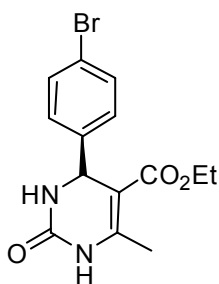

White solid; mp 209-210 °C;  $[\alpha]_D^{20} = 38^\circ$  (c = 0.5, MeOH);  $^1\text{H-NMR}$  (400 MHz,  $\text{CDCl}_3$ ):  $\delta$  1.17 (t,  $^3J_{\text{H,H}} = 7.2$  Hz, 3H,  $\text{OCH}_2\text{CH}_3$ ), 2.33 (s, 3H,  $\text{CH}_3$ ), 4.09 (q,  $^3J_{\text{H,H}} = 7.2$  Hz, 2H,  $\text{OCH}_2\text{CH}_3$ ), 5.35 (d,  $^3J_{\text{H,H}} = 2.8$  Hz, 1H, CH), 6.15 (s, 1H, NH), 7.18-7.44 (m, 4H, Ph), 8.46 (s, 1H, NH);  $^{13}\text{C-NMR}$  (75 MHz,  $\text{CDCl}_3$ ):  $\delta$  14.19,

18.69, 55.12, 60.19, 100.99, 121.88, 128.38, 131.83, 142.72, 146.58, 153.42, 153.48, 165.47; ESI-MS: 336.93 ([M-H]); The enantiomeric excess was determined to be 44% by HPLC with Chiralcel OD-H column (25 cm) at 254 nm; eluent: hexane:  $^i\text{PrOH}$  (85:15), flow rate = 1.0 mL/min,  $t_r = 8.681$  min (major),  $t_r = 13.947$  min (minor).

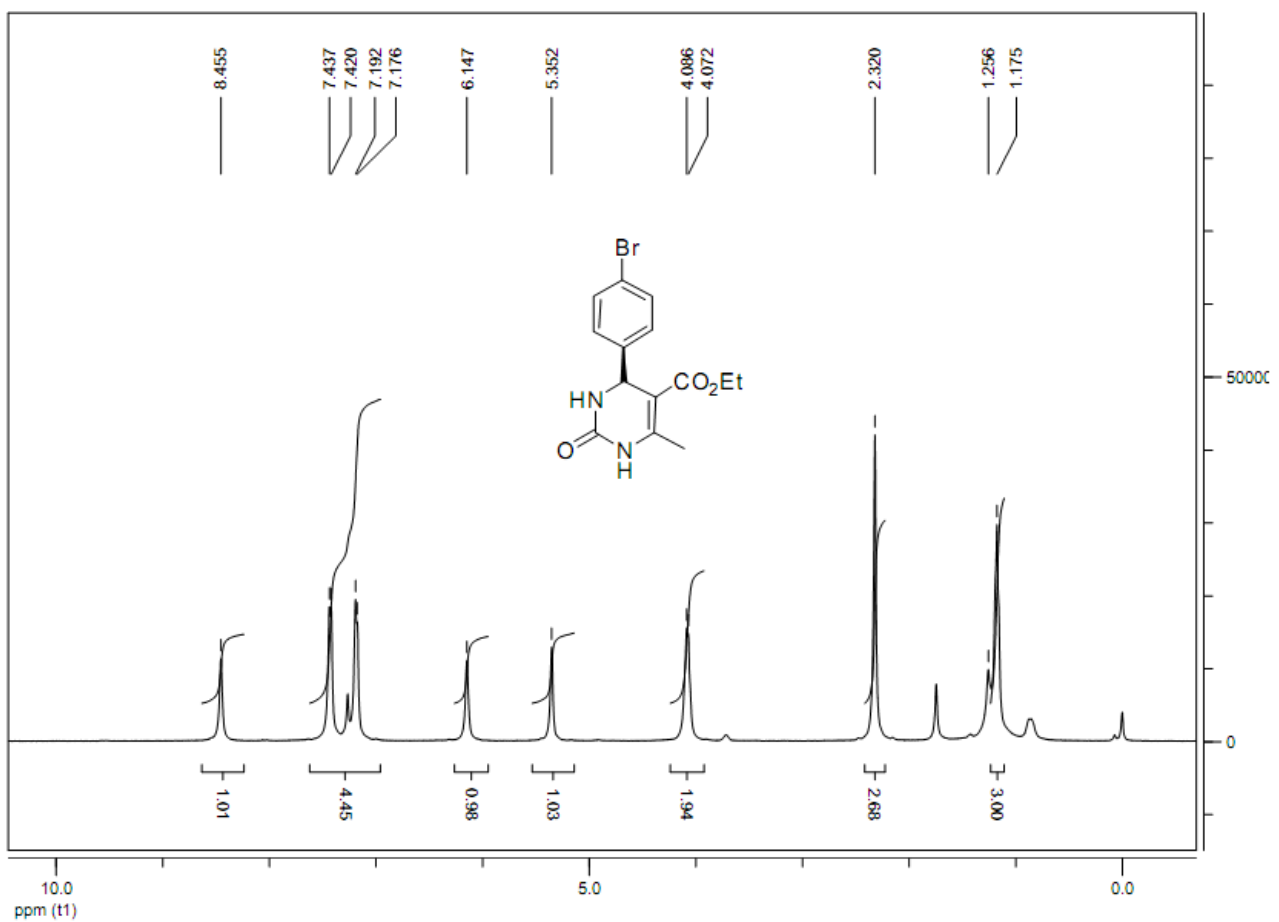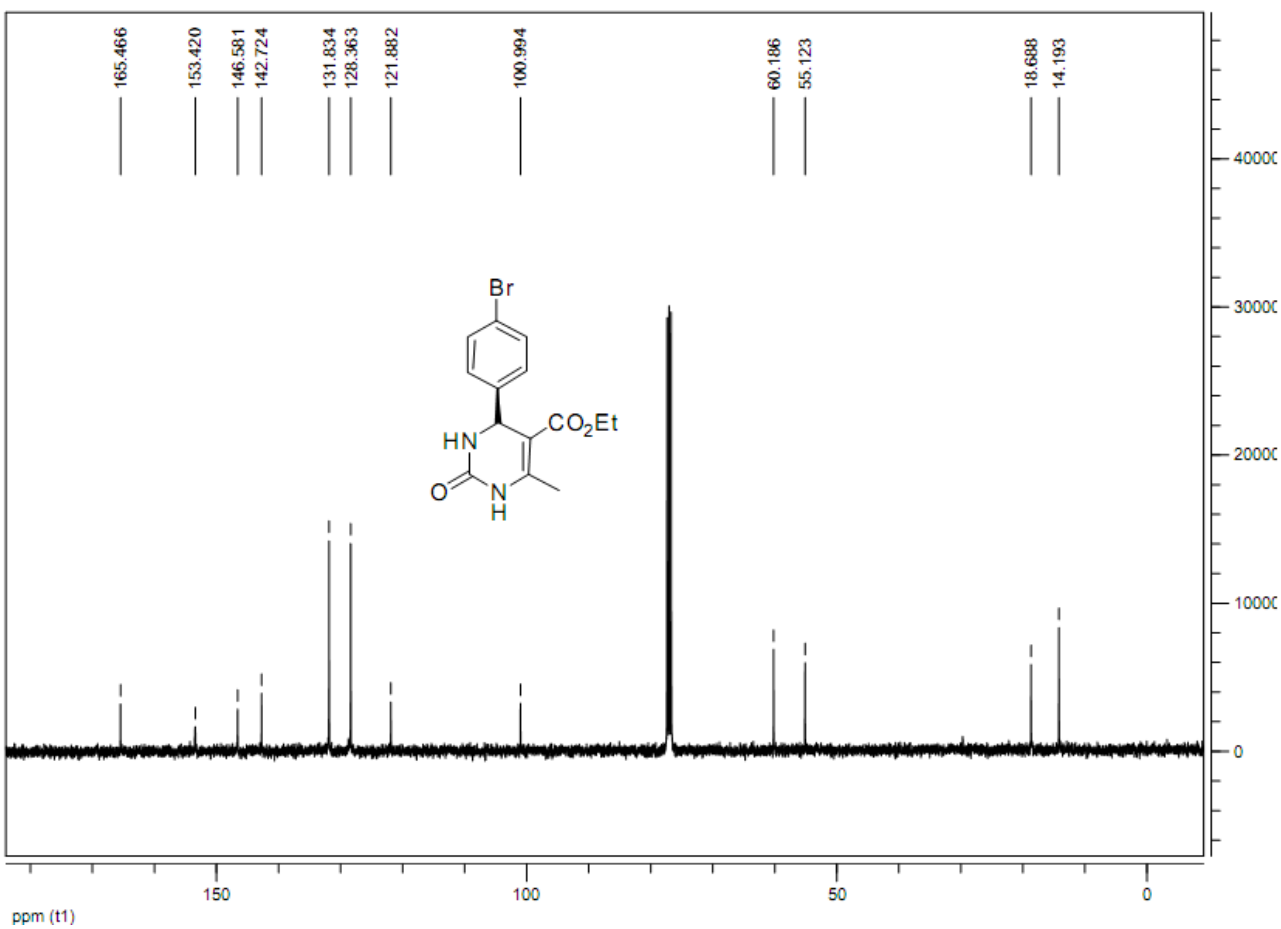

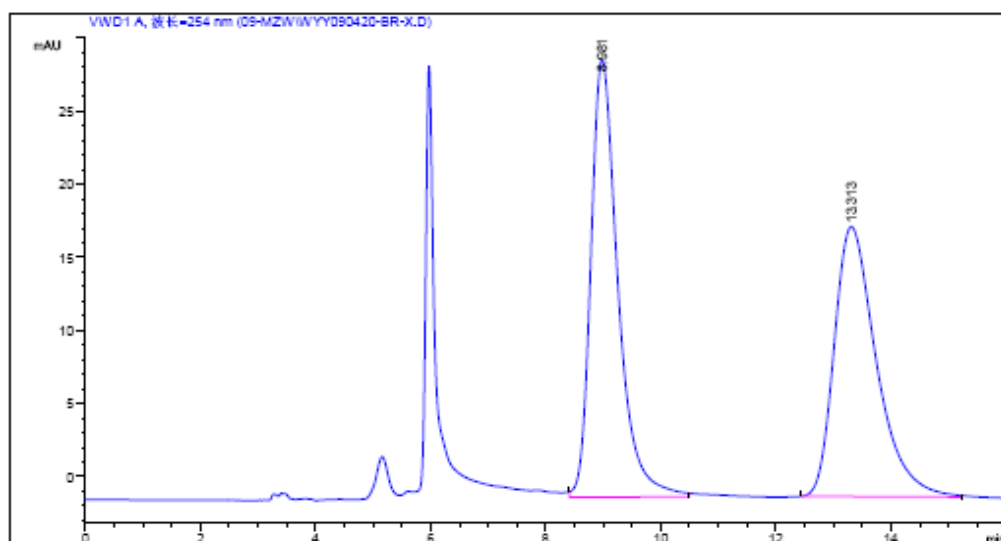

信号 1: VWD1 A, 波长=254 nm

| 峰 #  | 保留时间 [min] | 类型 | 峰宽 [min] | 峰面积 mAU *s | 峰高 [mAU] | 峰面积 %   |
|------|------------|----|----------|------------|----------|---------|
| 1    | 8.981      | BB | 0.4998   | 981.81927  | 29.88554 | 51.1837 |
| 2    | 13.313     | BB | 0.7786   | 936.40894  | 18.44654 | 48.8163 |
| 总量 : |            |    |          | 1918.22821 | 48.33208 |         |

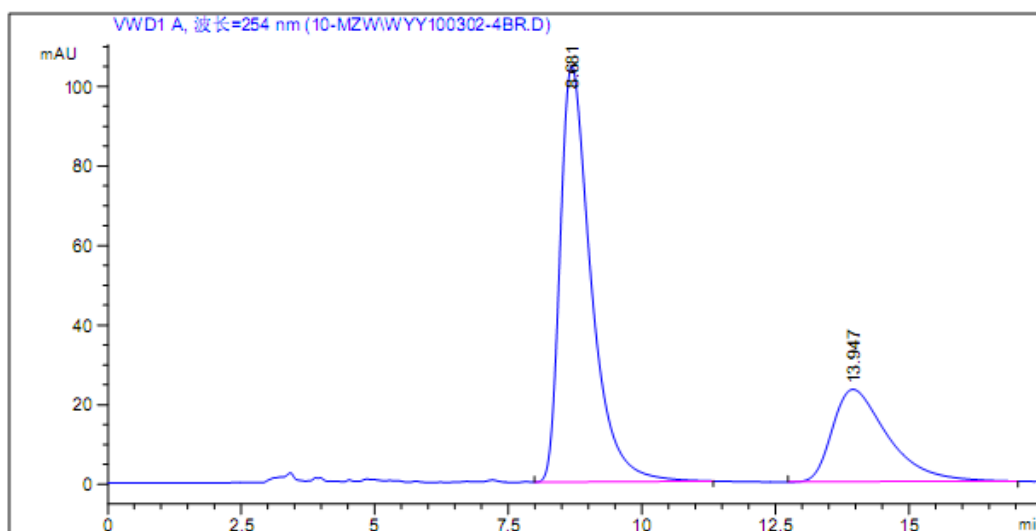

信号 1: VWD1 A, 波长=254 nm

| 峰 #  | 保留时间 [min] | 类型 | 峰宽 [min] | 峰面积 mAU *s | 峰高 [mAU]  | 峰面积 %   |
|------|------------|----|----------|------------|-----------|---------|
| 1    | 8.681      | VB | 0.6072   | 4224.18750 | 104.77307 | 71.4793 |
| 2    | 13.947     | BB | 1.0956   | 1685.48035 | 23.26661  | 28.5207 |
| 总量 : |            |    |          | 5909.66785 | 128.03969 |         |

**(S)-(+)-5-Ethoxycarbonyl-6-methyl-4-(4-methylphenyl)-3,4-dihydropyrimidin-2(1H)-one (8e):**

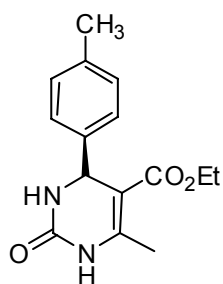

White solid; mp 213-214°C;  $[\alpha]_D^{20} = 56^\circ$  (c = 0.5, MeOH);  $^1\text{H-NMR}$  (400 MHz,  $\text{CDCl}_3$ ):  $\delta$  1.17 (t,  $^3J_{\text{H,H}} = 7.2$  Hz, 3H,  $\text{OCH}_2\text{CH}_3$ ), 2.30 (s, 3H,  $\text{CH}_3$ ), 2.31 (s, 3H,  $\text{CH}_3$ ), 4.07 (q,  $^3J_{\text{H,H}} = 7.2$  Hz, 2H,  $\text{OCH}_2\text{CH}_3$ ), 5.35 (d,  $^3J_{\text{H,H}} = 2.8$  Hz, 1H, CH), 6.16 (s, 1H, NH), 7.09-7.26 (m, 4H, Ph), 8.73 (s, 1H, NH);  $^{13}\text{C-NMR}$  (75 MHz,  $\text{CDCl}_3$ ):  $\delta$

14.17, 18.54, 21.12, 55.23, 59.93, 101.36, 126.47, 129.31, 137.59, 140.90, 146.39, 153.90, 165.74; ESI-MS: 273.07 ( $[\text{M-H}]^-$ ); The enantiomeric excess was determined to be 82% by HPLC with Chiralcel OD-H column (25 cm) at 254 nm; eluent: hexane:  $^i\text{PrOH}$  (85:15), flow rate = 1.0 mL/min,  $t_r = 8.126$  min (major),  $t_r = 12.935$  min (minor).

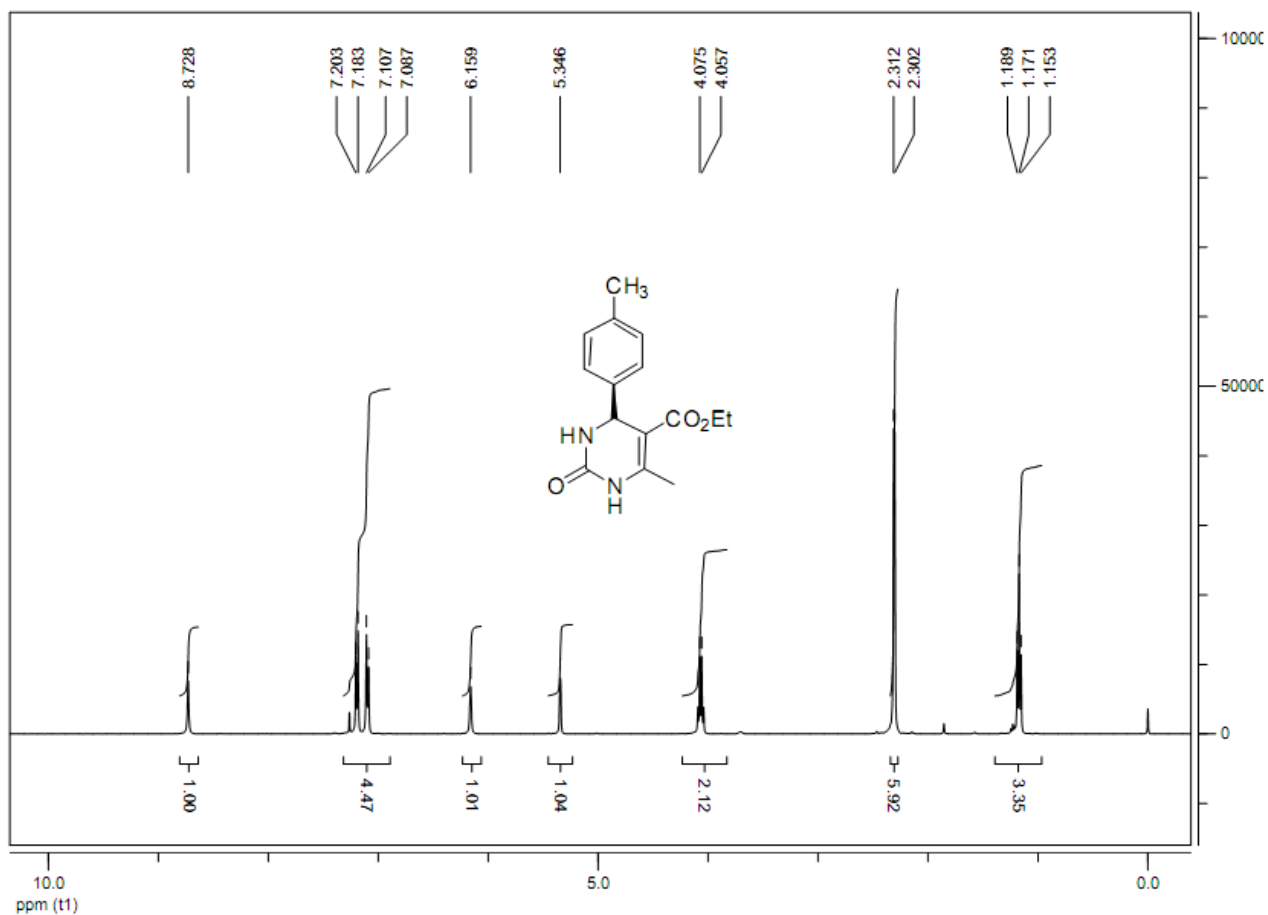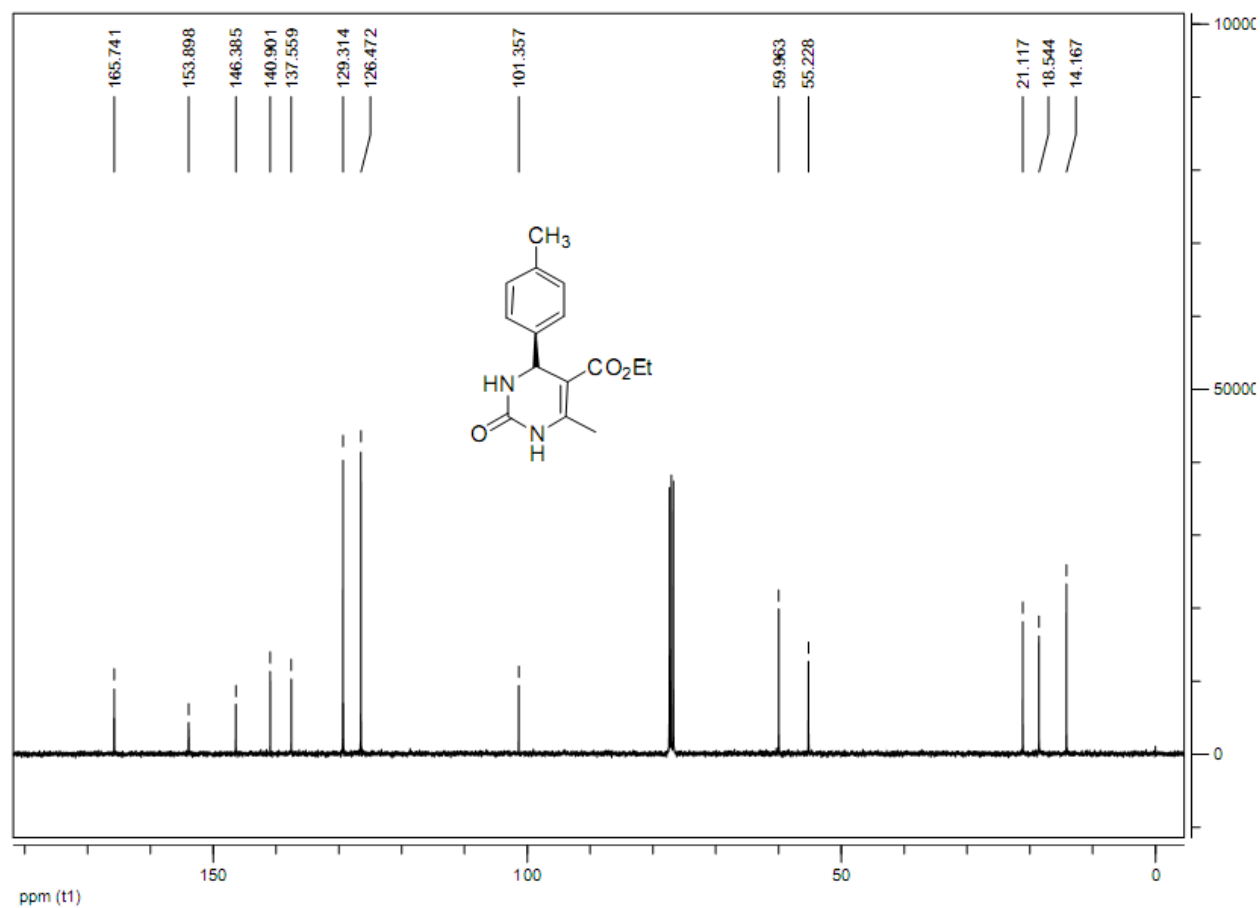

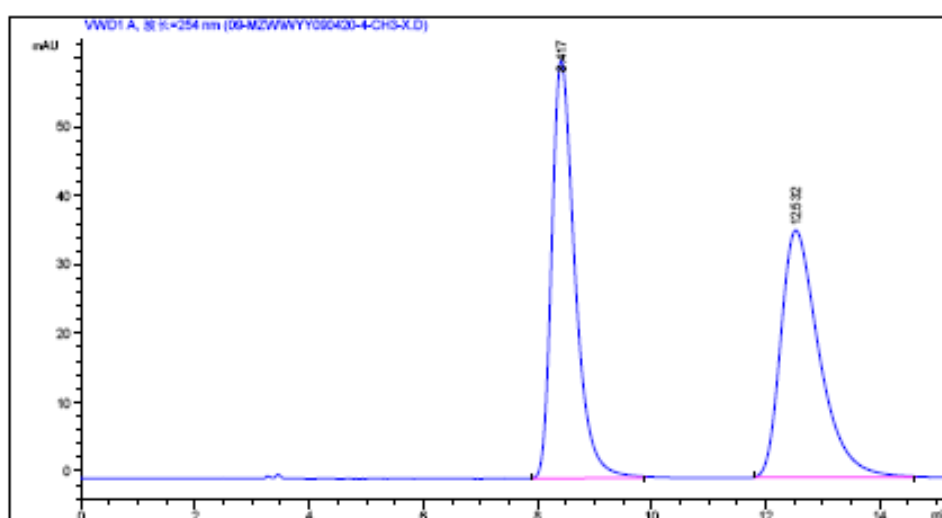

信号 1: VWD1 A, 波长=254 nm

| 峰 #  | 保留时间 [min] | 类型 | 峰宽 [min] | 峰面积 mAU    | 峰面积 % | 峰高 [mAU] | 峰面积 %   |
|------|------------|----|----------|------------|-------|----------|---------|
| 1    | 8.417      | BB | 0.4338   | 1711.18677 |       | 60.67921 | 50.3982 |
| 2    | 12.532     | BB | 0.7101   | 1684.14966 |       | 35.91995 | 49.6018 |
| 总量 : |            |    |          | 3395.33643 |       | 96.59916 |         |

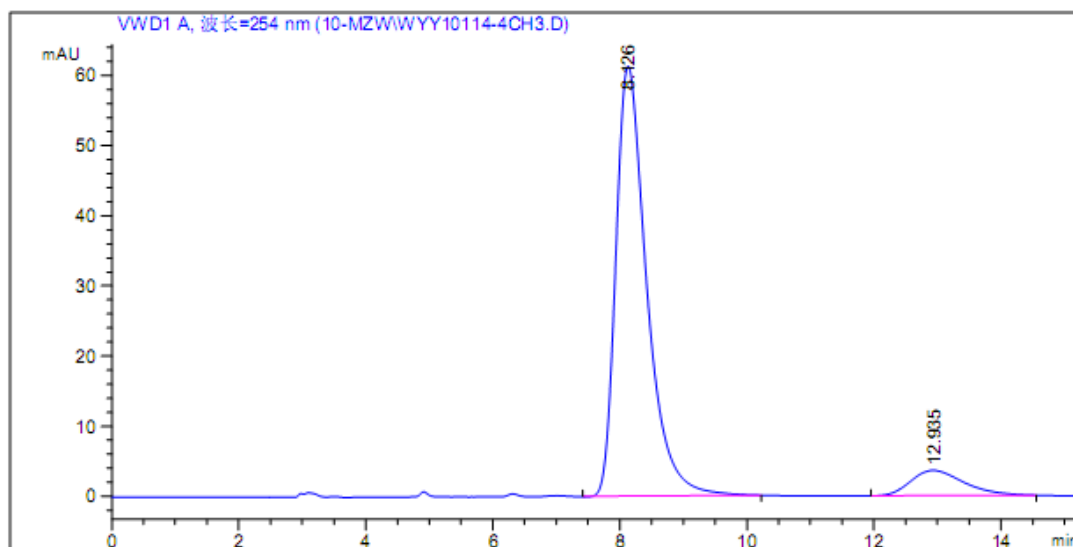



信号 1: VWD1 A, 波长=254 nm

| 峰 #  | 保留时间 [min] | 类型 | 峰宽 [min] | 峰面积 mAU *s | 峰高 [mAU] | 峰面积 %   |
|------|------------|----|----------|------------|----------|---------|
| 1    | 8.126      | VB | 0.5113   | 2075.77246 | 61.34453 | 90.6571 |
| 2    | 12.935     | BB | 0.8529   | 213.92456  | 3.61823  | 9.3429  |
| 总量 : |            |    |          | 2289.69702 | 64.96275 |         |

**(S)-(+)-5-Ethoxycarbonyl-6-methyl-4-(4-methoxyphenyl)-3,4-dihydropyrimidin-2(1H)-one (8f):**

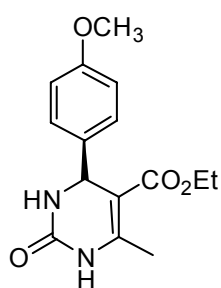

White solid; mp 202-205 °C;  $[\alpha]_D^{20} = 53^\circ$  (c = 0.5, MeOH);  $^1\text{H-NMR}$  (400 MHz,  $\text{CDCl}_3$ ):  $\delta$  1.17 (t,  $^3J_{\text{H,H}} = 7.2$  Hz, 3H,  $\text{OCH}_2\text{CH}_3$ ), 2.30 (s, 3H,  $\text{CH}_3$ ), 3.77 (s, 3H,  $\text{OCH}_3$ ), 4.07 (q,  $^3J_{\text{H,H}} = 7.2$  Hz, 2H,  $\text{OCH}_2\text{CH}_3$ ), 5.33 (d,  $^3J_{\text{H,H}} = 2.4$  Hz, 1H, CH), 6.24 (s, 1H, NH), 6.81-7.23 (m, 4H, Ph), 8.77 (s, 1H, NH);  $^{13}\text{C-NMR}$  (75 MHz,

$\text{CDCl}_3$ ):  $\delta$  14.20, 18.53, 54.96, 55.25, 59.98, 101.47, 101.47, 113.94, 127.81, 136.20, 146.26, 153.95, 159.16, 165.78; ESI-MS: 289.07 ( $[\text{M-H}]^-$ ); The enantiomeric excess was determined to be 89% by HPLC with Chiralcel OD-H column (25 cm) at 254 nm; eluent: hexane:  $^i\text{PrOH}$  (85:15), flow rate = 1.0 mL/min, tr = 8.513 min (major), tr = 12.925 min

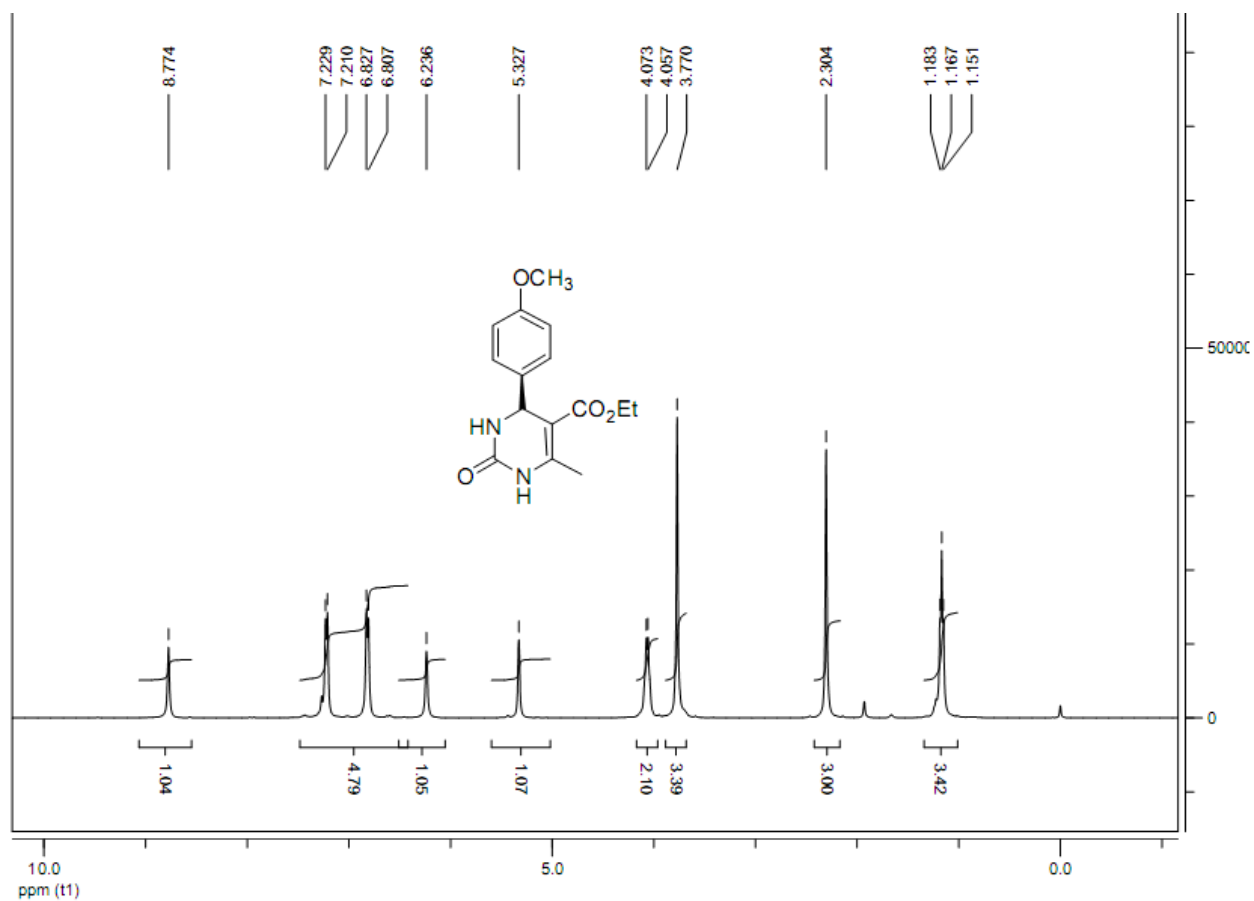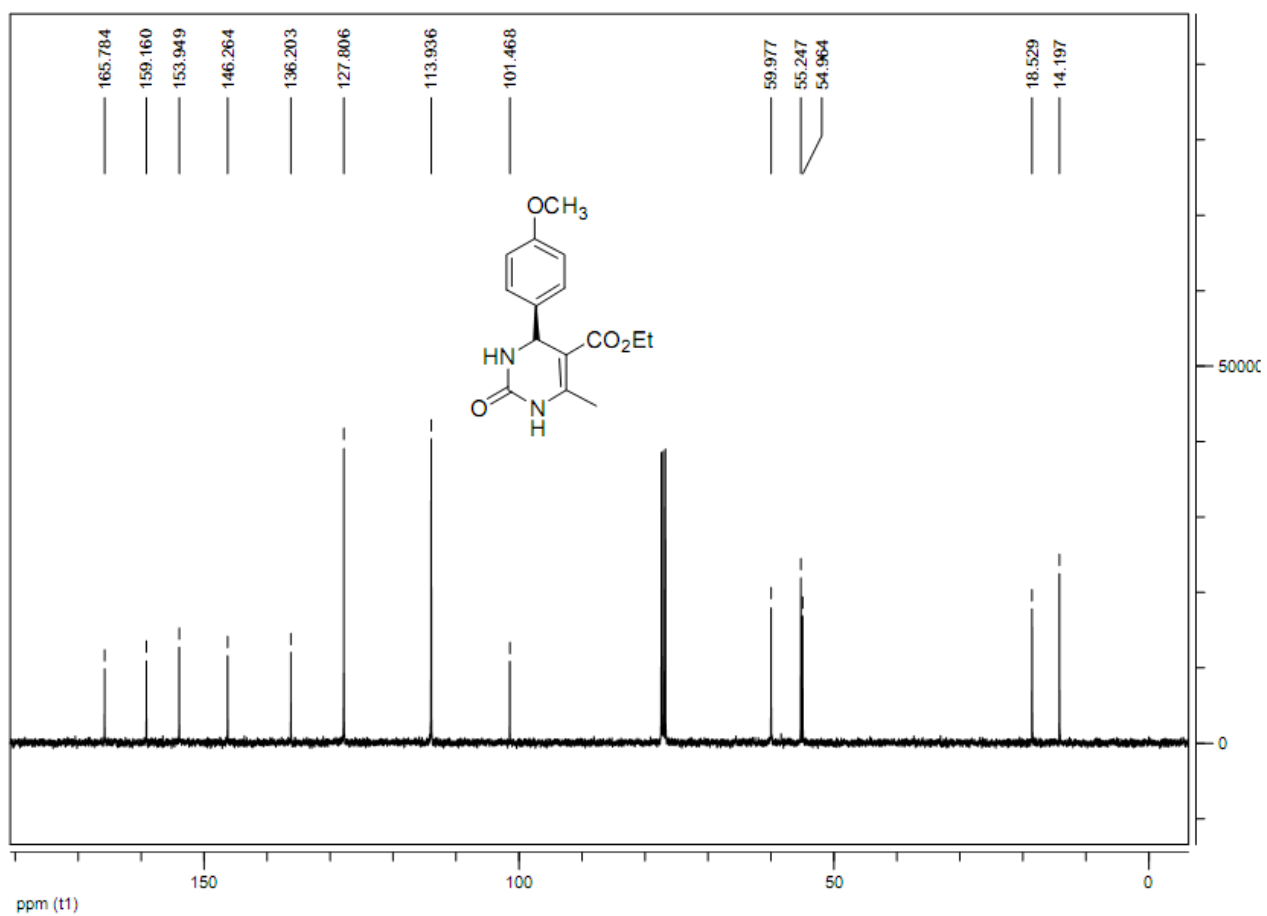

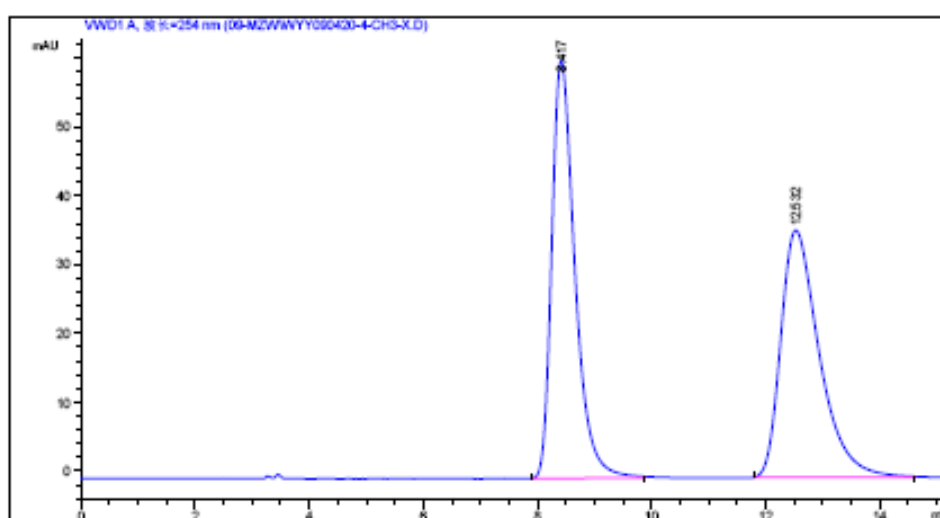

信号 1: VWD1 A, 波长=254 nm

| 峰 #  | 保留时间 [min] | 类型 | 峰宽 [min] | 峰面积 mAU    | 峰面积 % | 峰高 [mAU] | 峰面积 %   |
|------|------------|----|----------|------------|-------|----------|---------|
| 1    | 8.417      | BB | 0.4338   | 1711.18677 |       | 60.67921 | 50.3982 |
| 2    | 12.532     | BB | 0.7101   | 1684.14966 |       | 35.91995 | 49.6018 |
| 总量 : |            |    |          | 3395.33643 |       | 96.59916 |         |

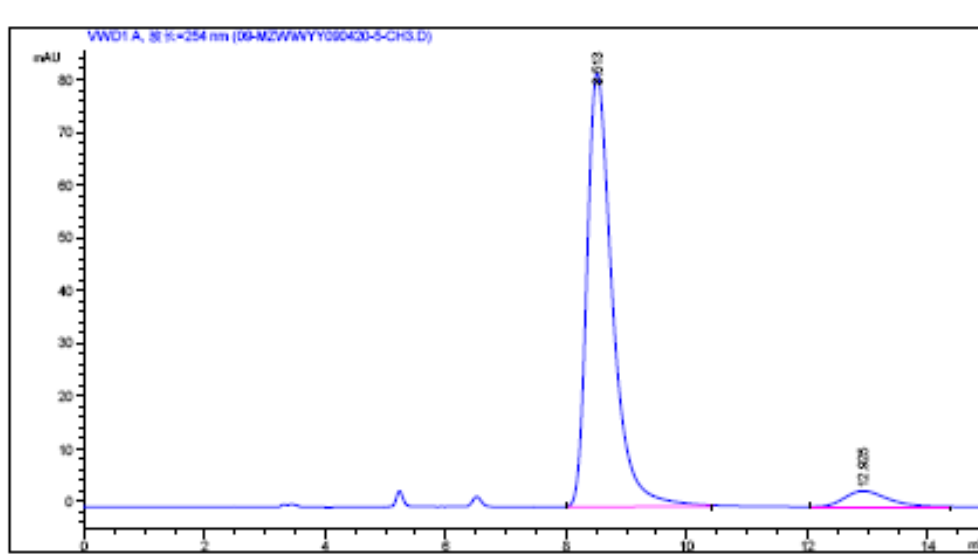

信号 1: VWD1 A, 波长=254 nm

| 峰 #  | 保留时间 [min] | 类型 | 峰宽 [min] | 峰面积 mAU %  | 峰高 [mAU] | 峰面积 %   |
|------|------------|----|----------|------------|----------|---------|
| 1    | 8.513      | BB | 0.4482   | 2416.12036 | 82.08931 | 94.1423 |
| 2    | 12.925     | BB | 0.7570   | 150.33621  | 3.01221  | 5.8577  |
| 总量 : |            |    |          | 2566.45657 | 85.10152 |         |

**(S)-(+)-5-Ethoxycarbonyl-6-methyl-4-(3-fluorophenyl)-3,4-dihydropyrimidin-2(1H)-one (8g):**

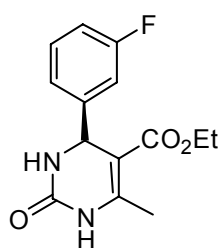

White solid; mp 212-213 °C;  $[\alpha]_D^{20} = 58^\circ$  (c = 0.5, MeOH);  $^1\text{H-NMR}$  (400 MHz,  $\text{CDCl}_3$ ):  $\delta$  1.18 (t,  $^3J_{\text{H,H}} = 7.2$  Hz, 3H,  $\text{OCH}_2\text{CH}_3$ ), 2.37 (s, 3H,  $\text{CH}_3$ ), 4.10 (q,  $^3J_{\text{H,H}} = 7.2$  Hz, 2H,  $\text{OCH}_2\text{CH}_3$ ), 5.41 (s, 1H, CH), 5.53 (s, 1H, NH), 6.95-7.27 (m, 4H, Ph), 7.34(s, 1H, NH);  $^{13}\text{C-NMR}$  (75 MHz,  $\text{CDCl}_3$ ):  $\delta$  14.17, 18.77, 55.28, 60.20, 100.96,

113.61, 114.92, 122.19, 130.30, 146.09, 146.67, 153.10, 161.72, 165.45; ESI-MS: 277.07 ( $[\text{M-H}]^-$ ); The enantiomeric excess was determined to be 87% by HPLC with Chiralpak AS-H column (25 cm) at 254 nm; eluent: hexane:  $i\text{-PrOH}$  (70:30), flow rate = 1.0 mL/min,  $t_r = 9.503$  min (major),  $t_r = 11.811$  min (minor).

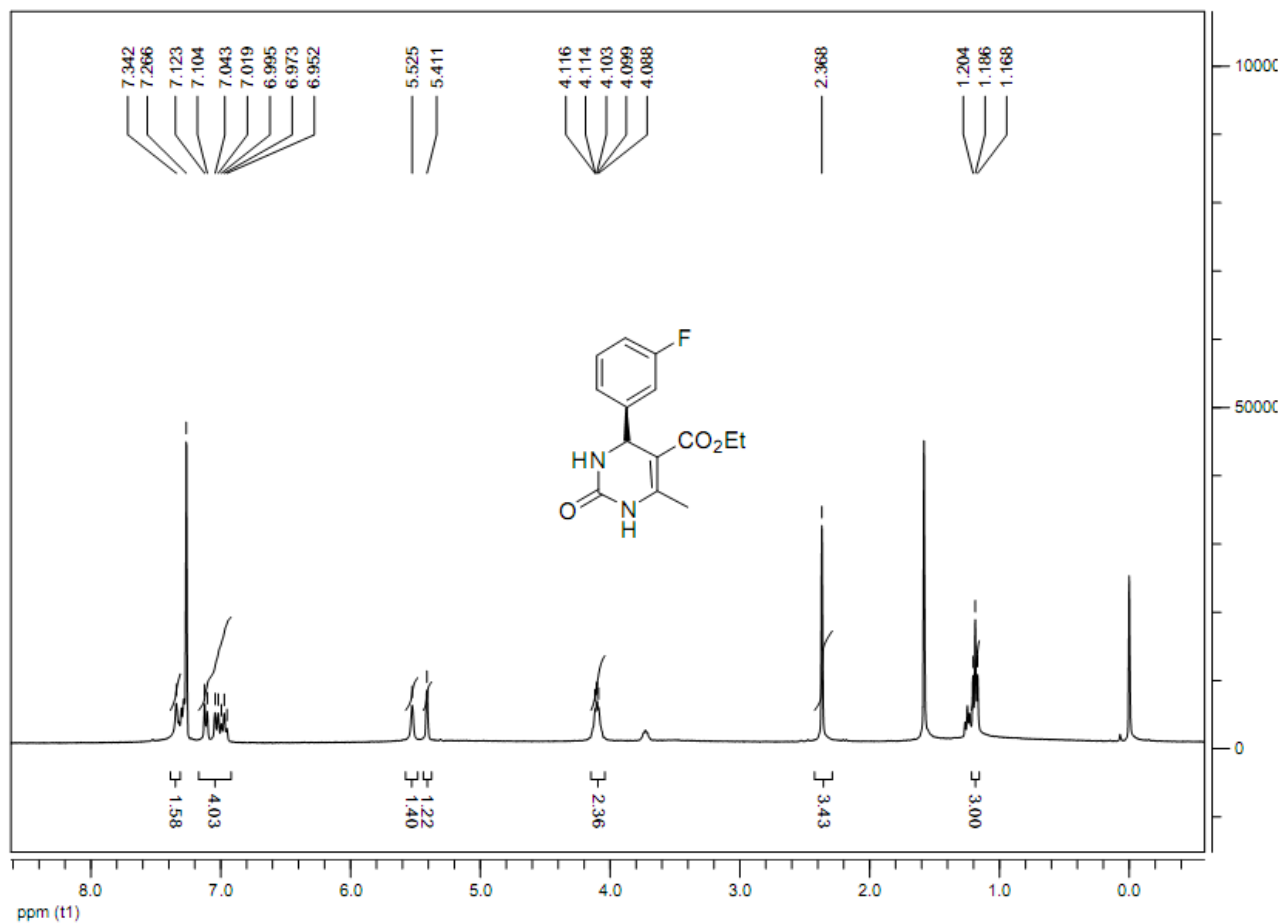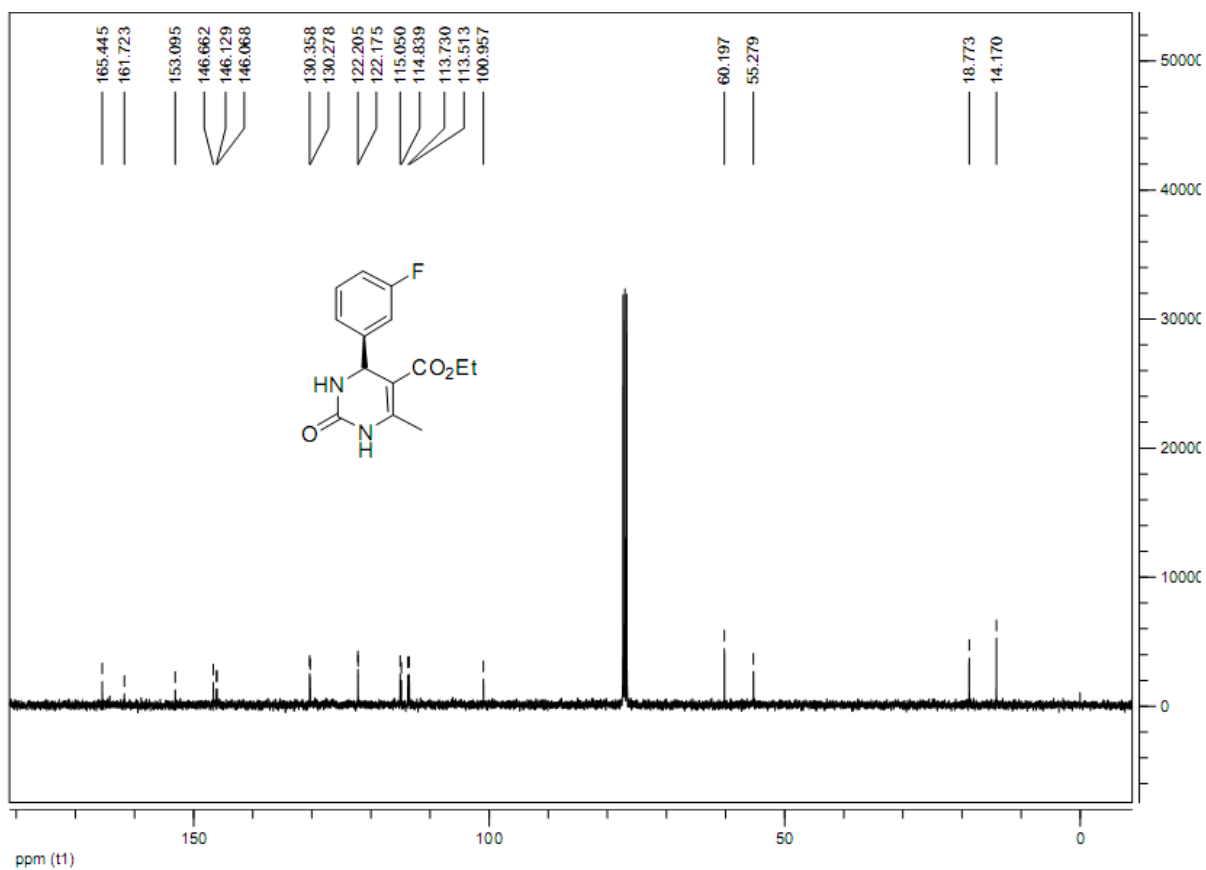

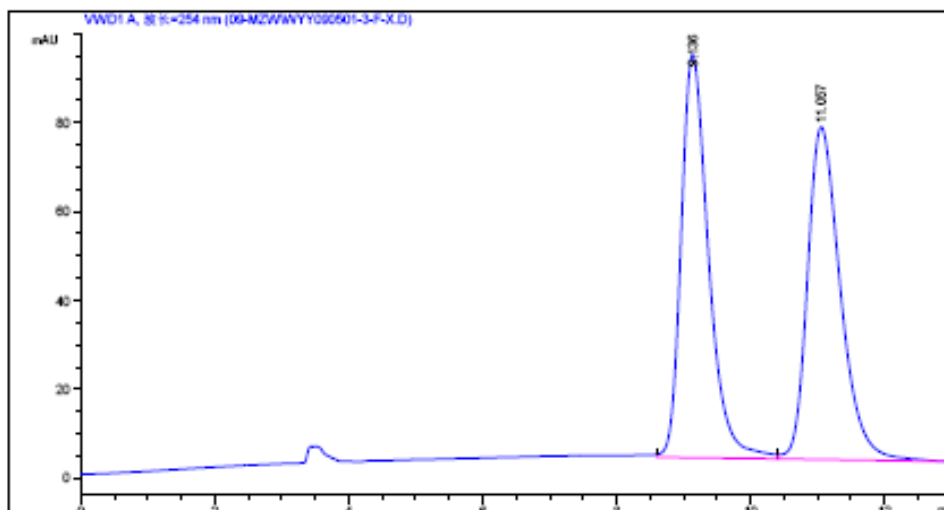

信号 1: VWD1 A, 波长=254 nm

| 峰 # | 保留时间 [min] | 类型  | 峰宽 [min] | 峰面积 mAU *s | 峰高 [mAU] | 峰面积 %   |
|-----|------------|-----|----------|------------|----------|---------|
| 1   | 9.136      | BV  | 0.4378   | 2582.80127 | 90.49676 | 50.1704 |
| 2   | 11.057     | VBA | 0.5164   | 2565.25342 | 74.83933 | 49.8296 |

总量 : 5148.05469 165.33609

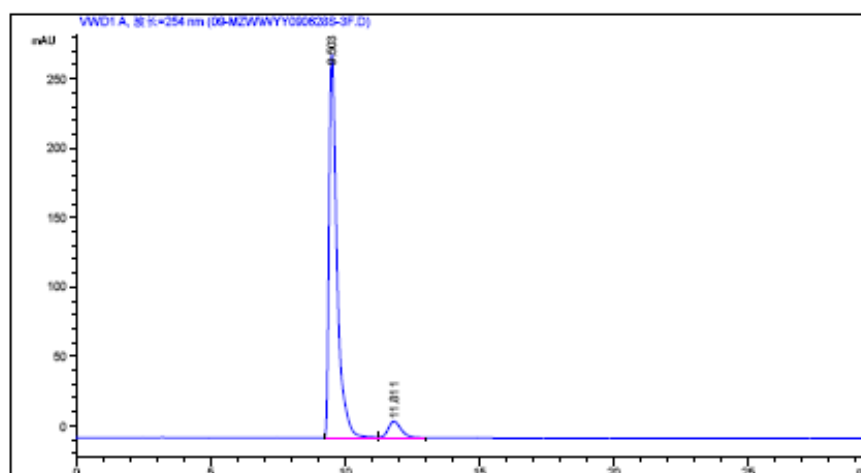

信号 1: VWD1 A, 波长=254 nm

| 峰 # | 保留时间 [min] | 类型 | 峰宽 [min] | 峰面积 mAU *s | 峰高 [mAU]  | 峰面积 %   |
|-----|------------|----|----------|------------|-----------|---------|
| 1   | 9.503      | BB | 0.3119   | 5739.23096 | 276.62656 | 93.3116 |
| 2   | 11.811     | BB | 0.5295   | 411.37854  | 11.95657  | 6.6884  |

总量 : 6150.60950 288.58313

**(S)-(+)-5-Ethoxycarbonyl-6-methyl-4-(3-methylphenyl)-3,4-dihydropyrimidin-2(1H)-one (8h):**

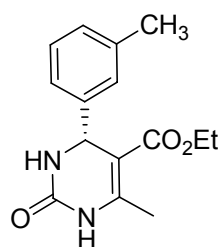

White solid; mp 209-210 °C;  $[\alpha]_D^{20} = 56^\circ$  (c = 0.5, MeOH);  $^1\text{H-NMR}$  (400 MHz,  $\text{CDCl}_3$ ):  $\delta$  1.17 (t,  $^3J_{H,H} = 6.8$  Hz, 3H,  $\text{OCH}_2\text{CH}_3$ ), 2.33 (s, 3H,  $\text{CH}_3$ ), 2.34 (s, 3H,  $\text{CH}_3$ ), 4.07 (q,  $^3J_{H,H} = 6.8$  Hz, 2H,  $\text{OCH}_2\text{CH}_3$ ), 5.36 (s, 1H, NH), 5.72 (s, 1H, CH), 7.06-7.26 (m, 4H, Ph), 8.25 (s, 1H, NH);  $^{13}\text{C-NMR}$  (75 MHz,  $[\text{D}_6]\text{DMSO}$ ):  $\delta$  14.15,

18.70, 21.51, 55.75, 60.01, 101.34, 123.71, 127.28, 128.58, 128.74, 138.39, 143.66, 146.24, 153.39, 165.70; ESI-MS: 273.13 ( $[\text{M-H}]^-$ ); The enantiomeric excess was determined to be 80% by HPLC with Chiralcel OD-H column (25 cm) at 254 nm; eluent: hexane:  $^i\text{PrOH}$  (85:15), flow rate = 1.0 mL/min,  $t_r = 9.181$  min (major),  $t_r = 10.922$  min (minor).

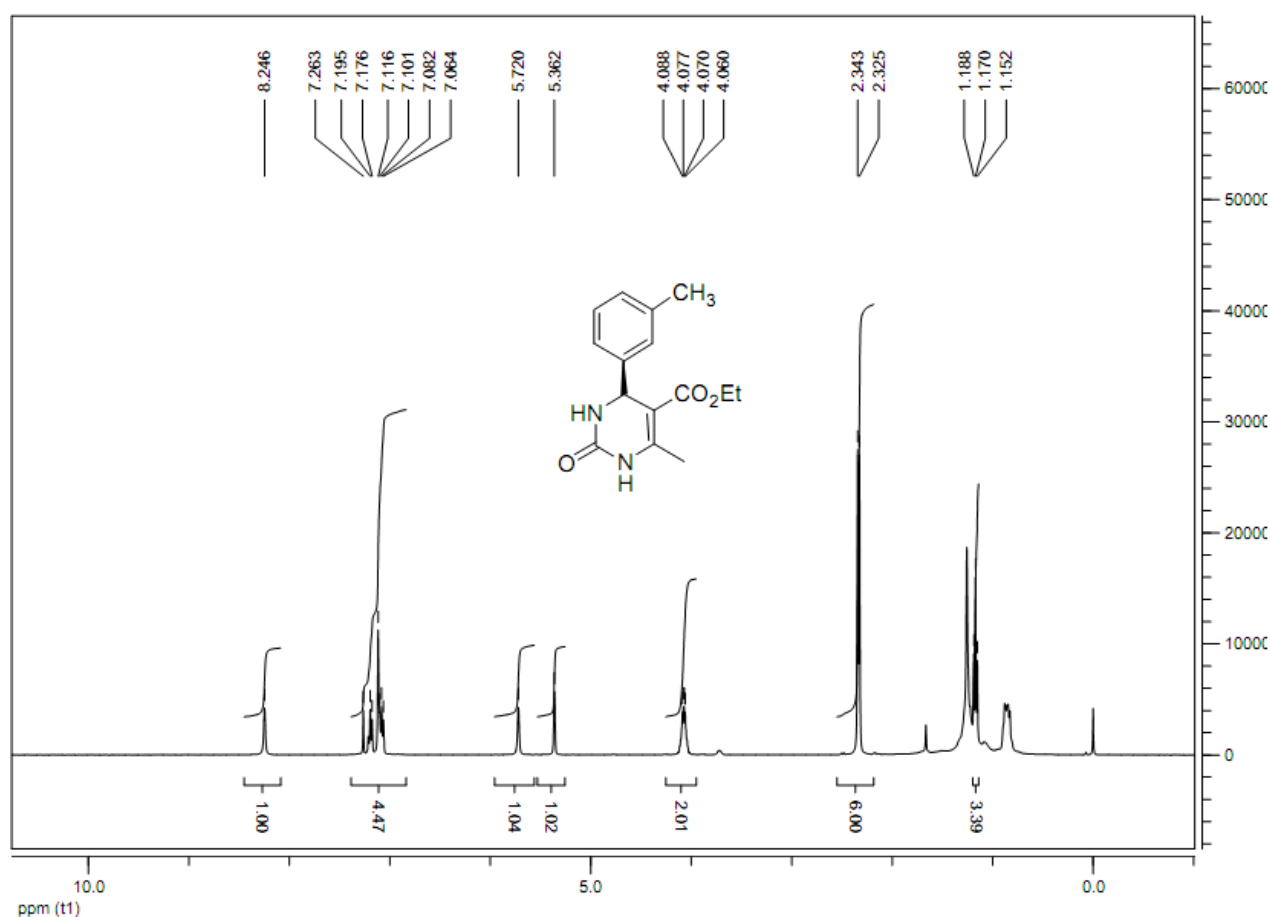

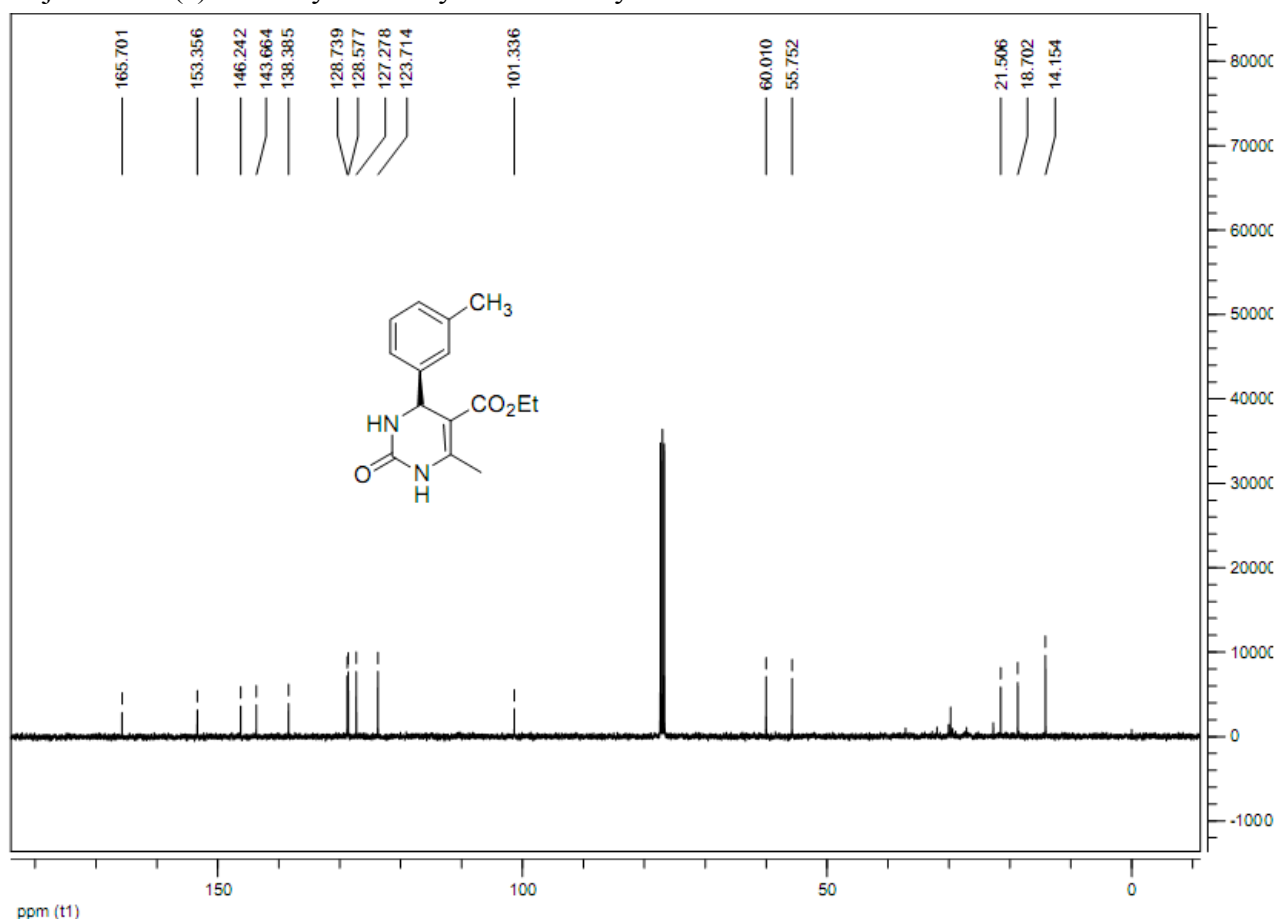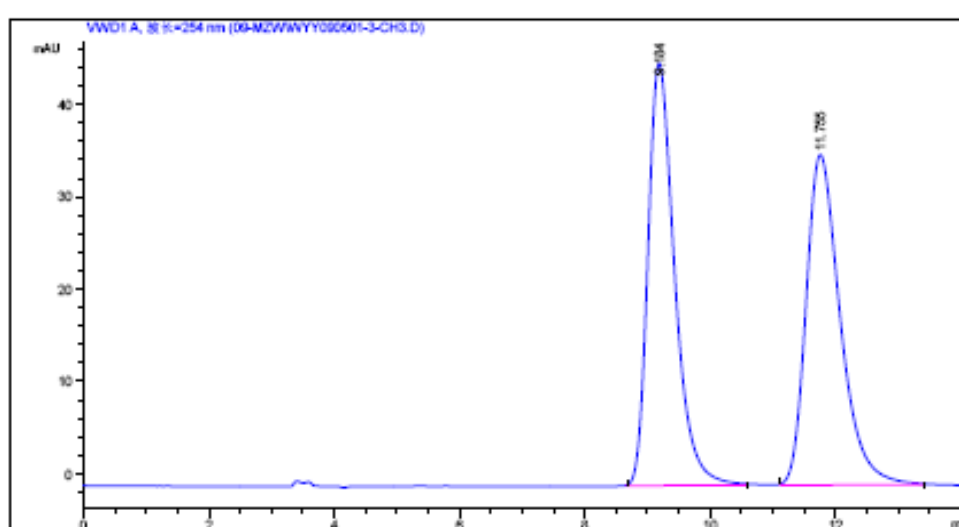

信号 1: VWD1 A, 波长=254 nm

| 峰 #  | 保留时间 [min] | 类型 | 峰宽 [min] | 峰面积 [mAU]  | 峰高 [mAU] | 峰面积 %   |
|------|------------|----|----------|------------|----------|---------|
| 1    | 9.184      | BB | 0.4512   | 1358.03381 | 45.74028 | 50.0463 |
| 2    | 11.755     | BB | 0.5814   | 1355.52246 | 35.80646 | 49.9537 |
| 总量 : |            |    |          | 2713.55627 | 81.54674 |         |



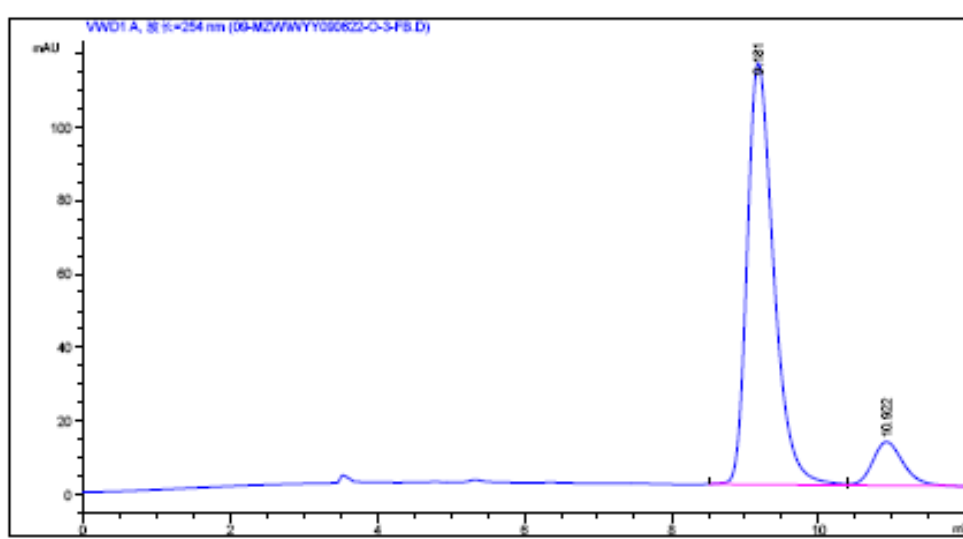

信号 1: VWD1 A, 波长=254 nm

| 峰 # | 保留时间 [min] | 类型 | 峰宽 [min] | 峰面积 mAU    | 峰高 [mAU]  | 峰面积 %   |
|-----|------------|----|----------|------------|-----------|---------|
| 1   | 9.181      | BV | 0.3865   | 2880.89209 | 114.57050 | 89.1361 |
| 2   | 10.922     | VB | 0.4484   | 351.12378  | 11.92386  | 10.8639 |

总量 : 3232.01587 126.49436

**(S)-(+)-5-Ethoxycarbonyl-6-methyl-4-(2-chlorophenyl)-3,4-dihydropyrimidin-2(1H)-one (8i):**

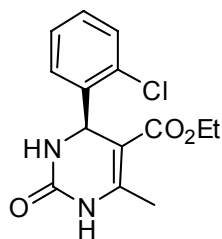

White solid; mp 228-230 °C;  $[\alpha]_D^{20} = 46^\circ$  (c = 0.5, MeOH);  $^1\text{H-NMR}$  (400 MHz, DMSO):  $\delta$  1.06 (t,  $^3J_{H,H} = 6.8$  Hz, 3H,  $\text{OCH}_2\text{CH}_3$ ), 2.45 (s, 3H,  $\text{CH}_3$ ), 4.01 (q,  $^3J_{H,H} = 6.8$  Hz, 2H,  $\text{OCH}_2\text{CH}_3$ ), 5.73 (s, 1H, CH), 5.89 (s, 1H, NH), 7.21-7.39 (m, 4H, Ph), 8.36 (s, 1H, NH);  $^{13}\text{C-NMR}$  (75 MHz,  $[\text{D}_6]\text{DMSO}$ ):  $\delta$  13.99, 18.43, 52.15, 60.02, 98.

94, 127.56, 127.98, 129.32, 129.82, 132.58, 139.43, 148.33, 152.84, 165.30; ESI-MS: 293.00 ( $[\text{M}+\text{H}]^+$ );

The enantiomeric excess was determined to be 81% by HPLC with Chiralcel OD-H column (25 cm) at 254 nm; eluent: hexane:  $^i\text{PrOH}$  (85:15), flow rate = 1.0 mL/min,  $t_r = 8.041$  min (major),  $t_r = 11.244$  min (minor).

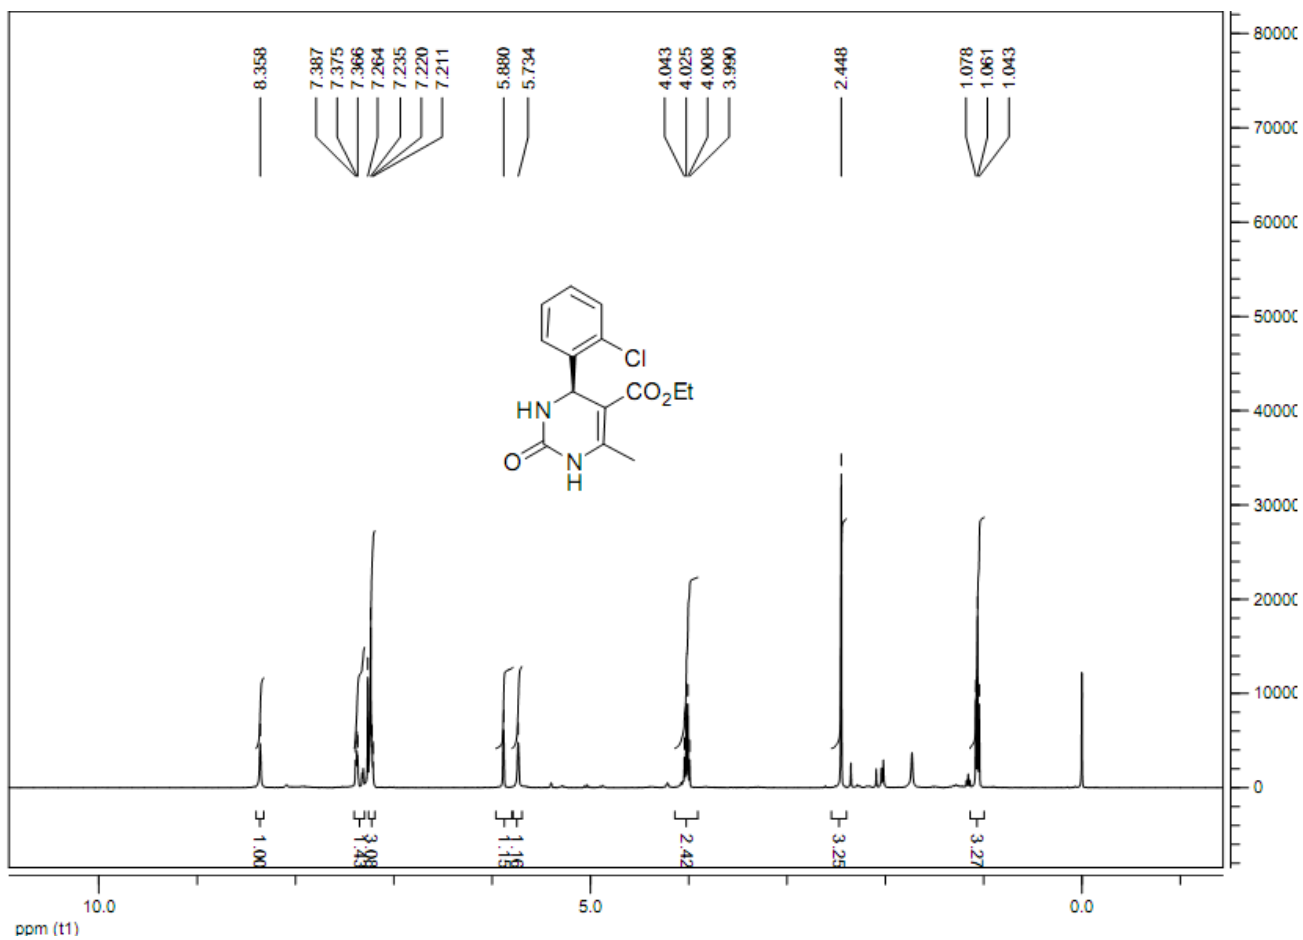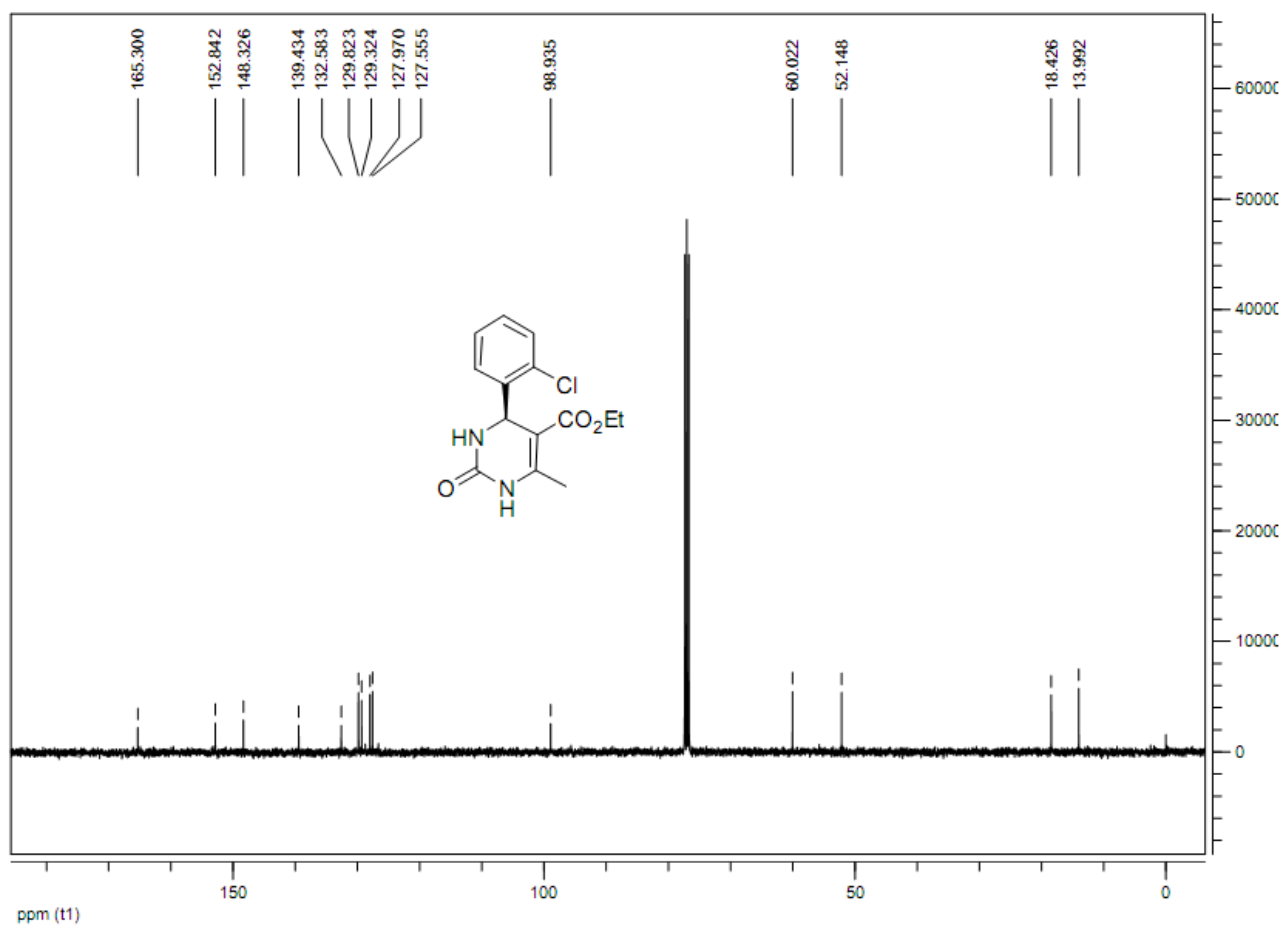

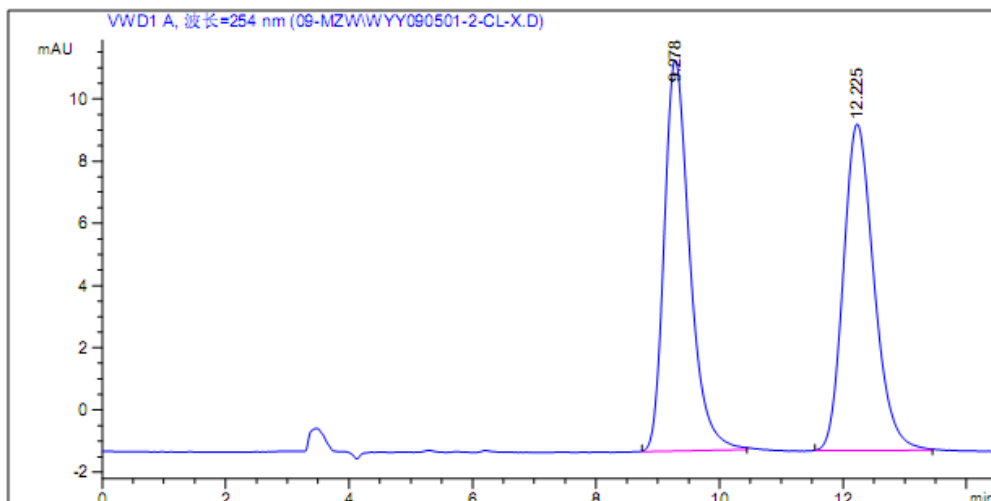

信号 1: VWD1 A, 波长=254 nm

| 峰 # | 保留时间 [min] | 类型 | 峰宽 [min] | 峰面积 mAU *s | 峰高 [mAU] | 峰面积 %   |
|-----|------------|----|----------|------------|----------|---------|
| 1   | 9.278      | BB | 0.4396   | 360.80243  | 12.57282 | 49.9582 |
| 2   | 12.225     | BB | 0.5326   | 361.40637  | 10.49895 | 50.0418 |

总量 : 722.20880 23.07177

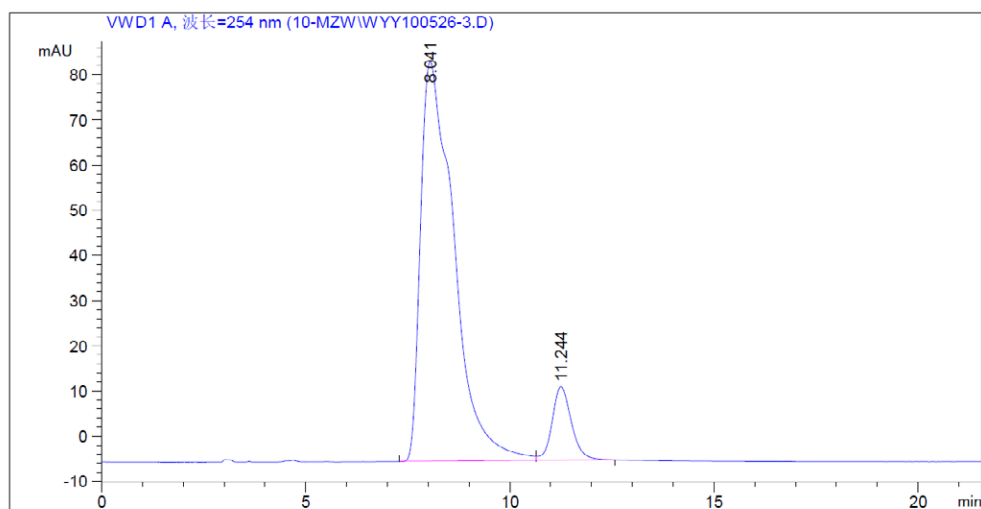

信号 1: VWD1 A, 波长=254 nm

| 峰 # | 保留时间 [min] | 类型 | 峰宽 [min] | 峰面积 mAU *s | 峰高 [mAU] | 峰面积 %   |
|-----|------------|----|----------|------------|----------|---------|
| 1   | 8.041      | BV | 0.7886   | 5031.47412 | 88.48997 | 90.2858 |
| 2   | 11.244     | VB | 0.5033   | 541.35535  | 16.32931 | 9.7142  |

总量 : 5572.82947 104.81928

**(R)-(-)-5-Ethoxycarbonyl-6-methyl-4-phenyl-3,4-dihydropyrimidin-2(1H)-one (8j) :**

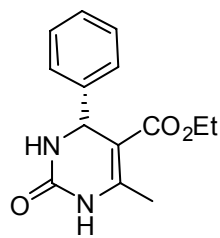

White solid; mp 202-204 °C;  $[\alpha]_D^{20} = -64^\circ$  (c = 0.5, MeOH);  $^1\text{H-NMR}$  (400 MHz,  $\text{CDCl}_3$ ):  $\delta$  1.16 (t,  $^3J_{\text{H,H}} = 6.8$  Hz, 3H,  $\text{OCH}_2\text{CH}_3$ ), 2.32 (s, 3H,  $\text{CH}_3$ ), 4.07 (q,  $^3J_{\text{H,H}} = 6.8$  Hz, 2H,  $\text{OCH}_2\text{CH}_3$ ), 5.39(d,  $^3J_{\text{H,H}} = 2.4$  Hz, 1H, CH), 6.11(s, 1H, NH), 7.26-7.31 (m, 5H, Ph), 8.64 (s, 1H, NH);  $^{13}\text{C-NMR}$  (75 MHz,  $\text{CDCl}_3$ ):  $\delta$  14.16,

18.70, 55.73, 60.05, 101.35, 126.62, 127.98, 128.73, 143.71, 145.33, 153.33, 165.66. ESI-MS: 259.07 ( $[\text{M-H}]^-$ ); The enantiomeric excess was determined to be >99% by HPLC with Chiralcel OD-H column (25 cm) at 254 nm; eluent: hexane:  $^i\text{PrOH}$  (85:15), flow rate = 1.0 mL/min,  $t_r = 13.091$  min (major).

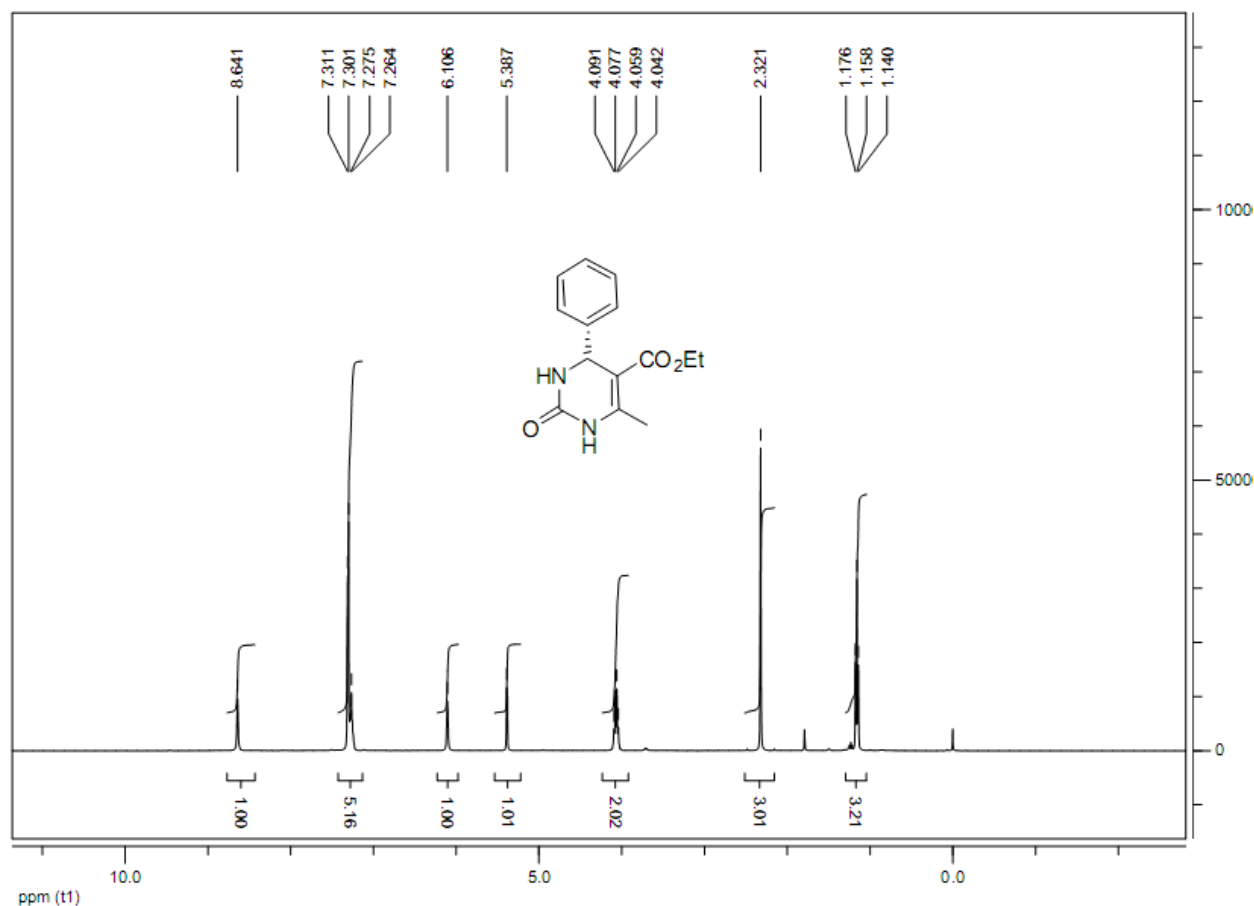

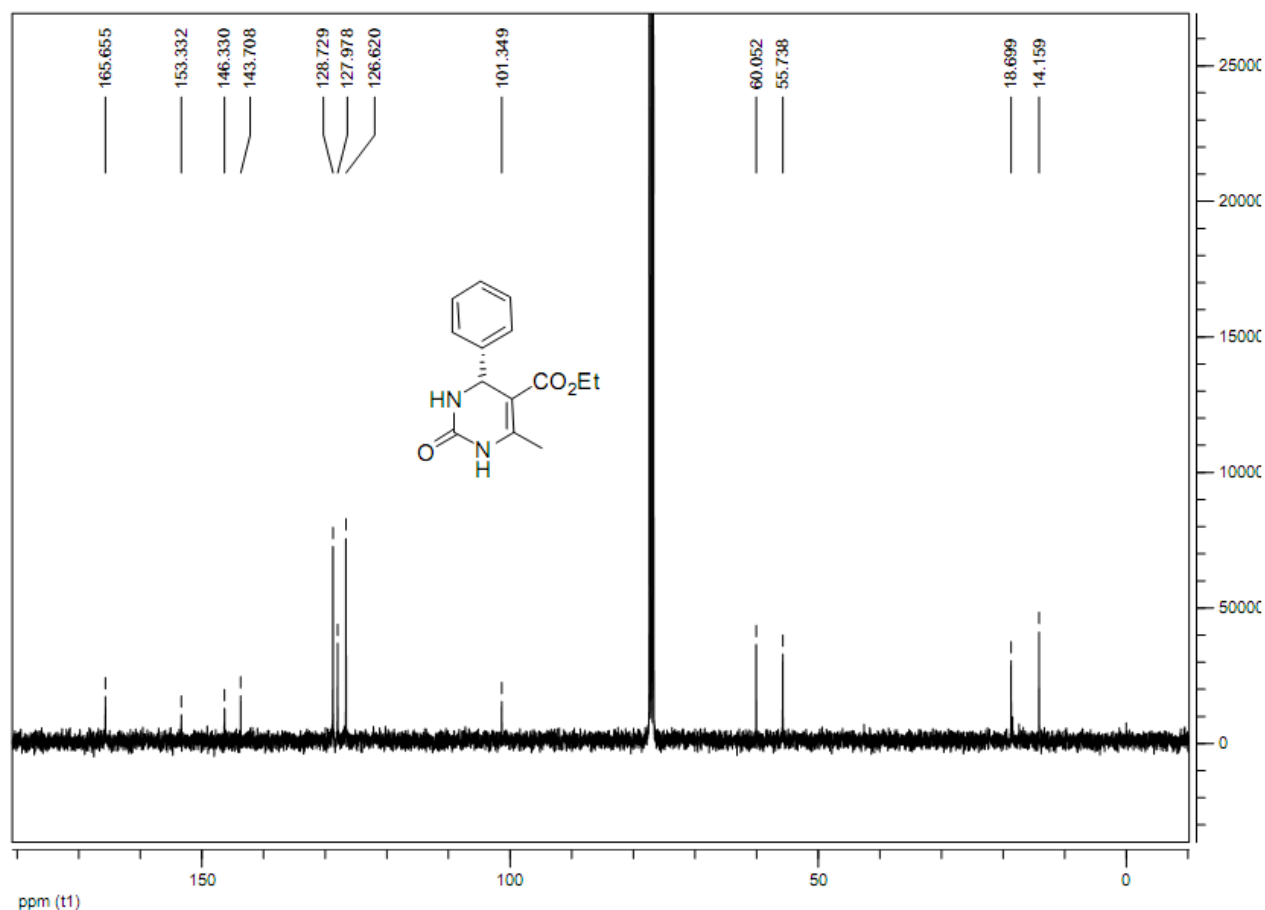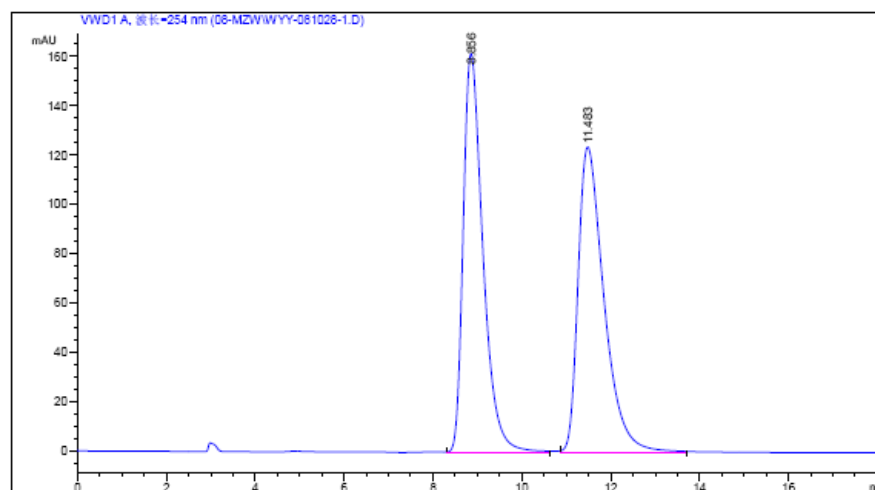

信号 1: VWD1 A, 波长=254 nm

| 峰 # | 保留时间 [min] | 类型 | 峰宽 [min] | 峰面积 mAU * s | 峰高 [mAU]  | 峰面积 %   |
|-----|------------|----|----------|-------------|-----------|---------|
| 1   | 8.856      | BB | 0.4766   | 4976.65479  | 161.21957 | 49.8219 |
| 2   | 11.483     | BB | 0.6124   | 5012.23193  | 123.73526 | 50.1781 |

总量 : 9988.88672 284.95483

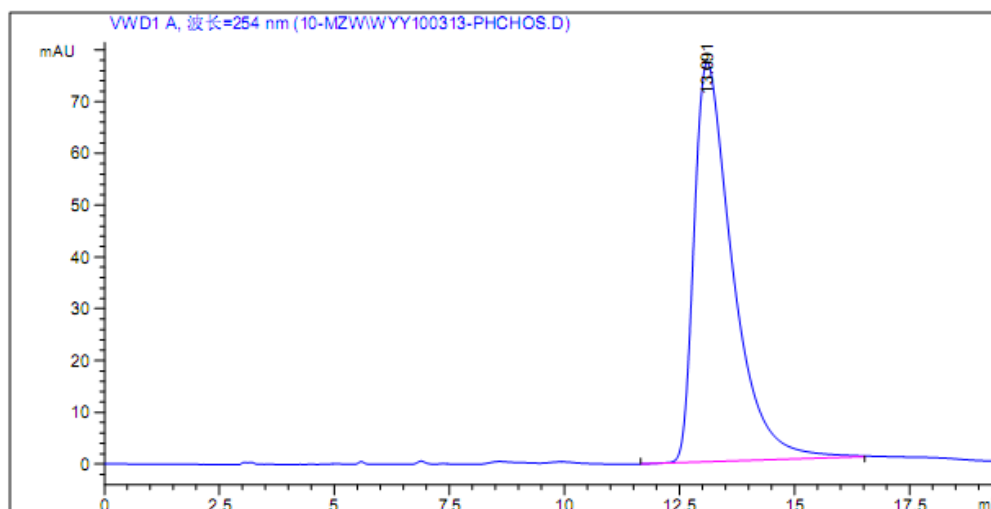

信号 1: VWD1 A, 波长=254 nm

| 峰 # | 保留时间 [min] | 类型 | 峰宽 [min] | 峰面积 mAU *s | 峰高 [mAU] | 峰面积 %    |
|-----|------------|----|----------|------------|----------|----------|
| 1   | 13.091     | BB | 0.8694   | 4476.23828 | 77.11614 | 100.0000 |

总量 : 4476.23828 77.11614
